# Supplementary material for: Optimal portfolio choice: a minimum expected loss approach
Source: Springer Nature journal article supplement (doi:10.1007/s11579-019-00246-w), 2019-09-07
Supplement: MOESM1 [file 17149484]

## Supplementary material

### Optimal portfolio choice: A minimum expected loss approach

Andrés Ramírez–Hassan · Rosember Guerra–Urzola

Received: date / Accepted: date

**Abstract** The mainstream in finance tackles portfolio selection based on a plug-in approach without consideration of the main objective of the inferential situation. We propose minimum expected loss (MELO) estimators for portfolio selection that explicitly consider the trading rule of interest. The asymptotic properties of our MELO proposal are similar to the plug-in approach. Nevertheless, simulation exercises show that our proposal exhibits better finite sample properties when compared to the competing alternatives, especially when the tangency portfolio is taken as the asset allocation strategy. We have also developed a graphical user interface to help practitioners to use our MELO proposal.

**Keywords** Bayesian estimation · minimum expected loss · portfolio selection

**JEL Classification:** C01; C11; G11.

## 1 Bayesian multivariate regression model

### 1.1 Informative priors

Given the structure of the Treynor–Black model, our point of departure is a multivariate regression model. We then analyze a particular trading strategy from this general framework.<sup>1</sup>

$$\mathbf{R} = \mathbf{X}\mathbf{B} + \mathbf{U},$$

---

Andrés Ramírez–Hassan

Department of Economics, School of Economics and Finance, Universidad EAFIT, Medellín, Colombia.

Tel.: +57-4-2619500

E-mail: aramir21@eafit.edu.co

Rosember Guerra–Urzola

Department of Methodology and Statistics, School of Social and Behavioral Science, Tilburg University.

Tel.: +31-134662965

E-mail: r.i.guerraurzola@uvt.nl

Department of Finance, School of Economics and Finance, Universidad EAFIT, Medellín, Colombia.

Tel.: +57-4-2619500

E-mail: rguerra@eafit.edu.co

<sup>1</sup> Although Bayesian books such as [1,2] present the multivariate regression setting, these books do not present some of the results that we require.

where  $\mathbf{R}$  is a  $T \times N$  matrix,  $\mathbf{X}$  is a  $T \times k$ ,  $\mathbf{B}$  is an  $k \times N$ , and  $\mathbf{U}$  is an  $T \times N$  matrix of disturbance terms with  $\text{vec}(\mathbf{U}) \sim N(\mathbf{0}, \boldsymbol{\Sigma} \otimes \mathbf{I}_T)$ .

Observe that the Treynor–Black model is a particular case of this framework, such that  $\mathbf{X} = [\mathbf{1} \ \mathbf{r}_M]$

and  $\mathbf{B} = \begin{bmatrix} \boldsymbol{\alpha}' \\ \boldsymbol{\beta}' \end{bmatrix}$ .

**Likelihood function:**

The likelihood function for the model is

$$\mathcal{L}(\mathbf{R} \mid \mathbf{B}, \boldsymbol{\Sigma}) \propto |\boldsymbol{\Sigma}|^{-T/2} \exp \left\{ -\frac{1}{2} \text{tr} \left[ \mathbf{S} + (\mathbf{B} - \widehat{\mathbf{B}})' \mathbf{X}' \mathbf{X} (\mathbf{B} - \widehat{\mathbf{B}}) \right] \boldsymbol{\Sigma}^{-1} \right\}, \quad (1.1)$$

where  $\mathbf{S} \equiv (\mathbf{R} - \mathbf{X}\widehat{\mathbf{B}})'(\mathbf{R} - \mathbf{X}\widehat{\mathbf{B}})$ ,  $\widehat{\mathbf{B}} \equiv (\mathbf{X}'\mathbf{X})^{-1}\mathbf{X}'\mathbf{R}$  and  $\text{tr}$  is the trace operator.

**Prior distribution:**

The prior distribution of the model parameters is  $\pi(\mathbf{B}, \boldsymbol{\Sigma}) = \pi(\mathbf{B} \mid \boldsymbol{\Sigma})\pi(\boldsymbol{\Sigma})$ , where  $\pi(\mathbf{B} \mid \boldsymbol{\Sigma}) \sim N(\mathbf{B}_0, \boldsymbol{\Sigma} \otimes \mathbf{V}_0)$  and  $\pi(\boldsymbol{\Sigma}) \sim IW(\mathbf{H}_0, \nu_0)$ ; that is:

$$\begin{aligned} \pi(\mathbf{B}, \boldsymbol{\Sigma}) &\propto |\boldsymbol{\Sigma}|^{-k/2} \exp \left\{ -\frac{1}{2} \text{tr} \left[ (\mathbf{B} - \mathbf{B}_0)' \mathbf{V}_0^{-1} (\mathbf{B} - \mathbf{B}_0) \right] \boldsymbol{\Sigma}^{-1} \right\} \\ &\times |\boldsymbol{\Sigma}|^{-(\nu_0 + N + 1)/2} \exp \left\{ -\frac{1}{2} \text{tr} \left[ \mathbf{H}_0 \boldsymbol{\Sigma}^{-1} \right] \right\}, \end{aligned} \quad (1.2)$$

This is the statistical setting for the informative Bayesian approach of the Treynor–Black model.

**Posterior distribution**

Combining the likelihood function (1.1) and the prior distribution (1.2) gives the following posterior distribution:

$$\begin{aligned} \pi(\mathbf{B}, \boldsymbol{\Sigma} \mid \mathbf{R}) &\propto \mathcal{L}(\mathbf{R} \mid \mathbf{B}, \boldsymbol{\Sigma})\pi(\mathbf{B} \mid \boldsymbol{\Sigma})\pi(\boldsymbol{\Sigma}) \\ &\propto |\boldsymbol{\Sigma}|^{-\frac{T+k+\nu_0+N+1}{2}} \exp \left\{ -\frac{1}{2} \text{tr} \left[ \mathbf{H}_0 + \mathbf{S} + (\mathbf{B} - \mathbf{B}_0)' \mathbf{V}_0^{-1} (\mathbf{B} - \mathbf{B}_0) + (\mathbf{B} - \widehat{\mathbf{B}})' \mathbf{X}' \mathbf{X} (\mathbf{B} - \widehat{\mathbf{B}}) \right] \right\}. \end{aligned}$$

Completing the squares on  $\mathbf{B}$  and collecting the remaining terms in the bracket yields

$$\begin{aligned} \mathbf{H}_0 + \mathbf{S} + (\mathbf{B} - \mathbf{B}_0)' \mathbf{V}_0^{-1} (\mathbf{B} - \mathbf{B}_0) + (\mathbf{B} - \widehat{\mathbf{B}})' \mathbf{X}' \mathbf{X} (\mathbf{B} - \widehat{\mathbf{B}}) \\ = (\mathbf{B} - \widetilde{\mathbf{B}})' \widetilde{\mathbf{V}}^{-1} (\mathbf{B} - \widetilde{\mathbf{B}}) + \widetilde{\mathbf{H}}, \end{aligned}$$

where

$$\begin{aligned} \widetilde{\mathbf{B}} &\equiv (\mathbf{V}_0^{-1} + \mathbf{X}'\mathbf{X})^{-1}(\mathbf{V}_0^{-1}\mathbf{B}_0 + \mathbf{X}'\mathbf{R}), \\ \widetilde{\mathbf{V}} &\equiv (\mathbf{V}_0^{-1} + \mathbf{X}'\mathbf{X})^{-1}, \\ \widetilde{\mathbf{H}} &\equiv \mathbf{H}_0 + \mathbf{S} + \mathbf{B}_0' \mathbf{V}_0^{-1} \mathbf{B}_0 + \widehat{\mathbf{B}}' \mathbf{X}' \mathbf{X} \widehat{\mathbf{B}} - \widetilde{\mathbf{B}}' \widetilde{\mathbf{V}}^{-1} \widetilde{\mathbf{B}}. \end{aligned}$$

Thus, the posterior distribution can be written as

$$\begin{aligned} \pi(\mathbf{B}, \boldsymbol{\Sigma} \mid \mathbf{R}) &\propto |\boldsymbol{\Sigma}|^{-k/2} \exp \left\{ -\frac{1}{2} \text{tr} \left[ (\mathbf{B} - \widetilde{\mathbf{B}})' \widetilde{\mathbf{V}}^{-1} (\mathbf{B} - \widetilde{\mathbf{B}}) \right] \boldsymbol{\Sigma}^{-1} \right\} \\ &\times |\boldsymbol{\Sigma}|^{-\frac{T+\nu_0+N+1}{2}} \exp \left\{ -\frac{1}{2} \text{tr} \left[ \widetilde{\mathbf{H}} \boldsymbol{\Sigma}^{-1} \right] \right\}. \end{aligned} \quad (1.3)$$

That is  $\pi(\mathbf{B}, \boldsymbol{\Sigma} | \mathbf{R}) \propto \pi(\mathbf{B} | \boldsymbol{\Sigma}, \mathbf{R})\pi(\boldsymbol{\Sigma} | \mathbf{R})$  where

$$\begin{aligned}\pi(\mathbf{B} | \boldsymbol{\Sigma}, \mathbf{R}) &\sim N(\tilde{\mathbf{B}}, \boldsymbol{\Sigma} \otimes \tilde{\mathbf{V}}), \\ \pi(\boldsymbol{\Sigma} | \mathbf{R}) &\sim IW(\tilde{\mathbf{H}}, \tilde{\nu}),\end{aligned}$$

where  $\tilde{\nu} = T + \nu_0$ .

### Predictive distribution

The point of departure of the predictive density for the next  $\kappa$  times periods is

$$\mathbf{R}_{T+\kappa} = \mathbf{Z}\mathbf{B} + \mathbf{V},$$

where  $\mathbf{R}_{T+\kappa}$  is a  $\kappa \times N$  matrix,  $\mathbf{Z}$  is a  $\kappa \times k$  matrix. Then, the predictive pdf for  $\mathbf{R}_{T+\kappa}$  is given by

$$p(\mathbf{R}_{T+\kappa} | \mathbf{R}, \mathbf{X}, \mathbf{Z}) \propto \int \int p(\mathbf{B}, \boldsymbol{\Sigma} | \mathbf{R}, \mathbf{X})p(\mathbf{R}_{T+\kappa} | \mathbf{Z}, \mathbf{B}, \boldsymbol{\Sigma})d\mathbf{B}d\boldsymbol{\Sigma}, \quad (1.4)$$

where

$$p(\mathbf{R}_{T+\kappa} | \mathbf{Z}, \mathbf{B}, \boldsymbol{\Sigma}) \propto |\boldsymbol{\Sigma}|^{-\kappa/2} \exp \left\{ -\frac{1}{2} \text{tr} [(\mathbf{R}_{T+\kappa} - \mathbf{Z}\mathbf{B})' (\mathbf{R}_{T+\kappa} - \mathbf{Z}\mathbf{B}) \boldsymbol{\Sigma}^{-1}] \right\}, \quad (1.5)$$

combining (1.3) and (1.5) we get,

$$|\boldsymbol{\Sigma}|^{-\frac{k+\tilde{\nu}+N+\kappa+1}{2}} \exp \left\{ -\frac{1}{2} \text{tr} [\mathbf{A}\boldsymbol{\Sigma}^{-1}] \right\},$$

where  $\mathbf{A} = (\mathbf{B} - \tilde{\mathbf{B}})' \tilde{\mathbf{V}}^{-1} (\mathbf{B} - \tilde{\mathbf{B}}) + \tilde{\mathbf{H}} + (\mathbf{R}_{T+\kappa} - \mathbf{Z}\mathbf{B})' (\mathbf{R}_{T+\kappa} - \mathbf{Z}\mathbf{B})$ . We use the inverse wishart properties to integrate (1.4) with respect to  $\boldsymbol{\Sigma}$ ,

$$|\mathbf{A}|^{-\frac{k+\tilde{\nu}+\kappa}{2}} = \left| \tilde{\mathbf{H}} + (\mathbf{B} - \tilde{\mathbf{B}})' \tilde{\mathbf{V}}^{-1} (\mathbf{B} - \tilde{\mathbf{B}}) + (\mathbf{R}_{T+\kappa} - \mathbf{Z}\mathbf{B})' (\mathbf{R}_{T+\kappa} - \mathbf{Z}\mathbf{B}) \right|^{-\frac{k+\tilde{\nu}+\kappa}{2}}.$$

To integrate with respect to  $\mathbf{B}$ , we complete the square on  $\mathbf{B}$ ,

$$\begin{aligned}A &= \tilde{\mathbf{H}} + \mathbf{B}' \tilde{\mathbf{V}}^{-1} \mathbf{B} - 2\mathbf{B}' \tilde{\mathbf{V}}^{-1} \tilde{\mathbf{B}} + \tilde{\mathbf{B}}' \tilde{\mathbf{V}}^{-1} \tilde{\mathbf{B}} \\ &\quad + \mathbf{R}'_{T+\kappa} \mathbf{R}_{T+\kappa} - 2\mathbf{B}' \mathbf{Z}' \mathbf{R}_{T+\kappa} + \mathbf{B}' \mathbf{Z}' \mathbf{Z} \mathbf{B} \\ &= \tilde{\mathbf{H}} + \tilde{\mathbf{B}}' \tilde{\mathbf{V}}^{-1} \tilde{\mathbf{B}} + \mathbf{R}'_{T+\kappa} \mathbf{R}_{T+\kappa} - \mathbf{B}^* \mathbf{M} \mathbf{B}^* \\ &\quad + \mathbf{B}' \mathbf{M} \mathbf{B} - 2\mathbf{B}' \mathbf{M} \mathbf{B}^* + \mathbf{B}^{*'} \mathbf{M} \mathbf{B}^* \\ &= \tilde{\mathbf{H}} + \tilde{\mathbf{B}}' \tilde{\mathbf{V}}^{-1} \tilde{\mathbf{B}} + \mathbf{R}'_{T+\kappa} \mathbf{R}_{T+\kappa} - \mathbf{B}^{*'} \mathbf{M} \mathbf{B}^* + (\mathbf{B} - \mathbf{B}^*)' \mathbf{M} (\mathbf{B} - \mathbf{B}^*),\end{aligned}$$

where  $\mathbf{M} = \tilde{\mathbf{V}}^{-1} + \mathbf{Z}' \mathbf{Z}$  and  $\mathbf{B}^* = \mathbf{M}^{-1} (\tilde{\mathbf{B}}' \tilde{\mathbf{V}}^{-1} + \mathbf{R}'_{T+\kappa} \mathbf{Z})$ .

Now, using properties of the generalized multivariate Student- $t$  pdf, we can perform the integration with respect to the parameter  $\mathbf{B}$ , which yields,

$$p(\mathbf{R}_{T+\kappa} | \mathbf{R}, \mathbf{X}, \mathbf{Z}) \propto \left| \tilde{\mathbf{H}} + \tilde{\mathbf{B}}' \tilde{\mathbf{V}}^{-1} \tilde{\mathbf{B}} + \mathbf{R}'_{T+\kappa} \mathbf{R}_{T+\kappa} - \mathbf{B}^{*'} \mathbf{M} \mathbf{B}^* \right|^{-\frac{\tilde{\nu}+\kappa}{2}}. \quad (1.6)$$

To simplify this expression we complete the square on  $\mathbf{R}_{T+\kappa}$  as follows,

$$\begin{aligned}
\tilde{\mathbf{B}}'\tilde{\mathbf{V}}^{-1}\tilde{\mathbf{B}} + \mathbf{R}'_{T+\kappa}\mathbf{R}_{T+\kappa} - \mathbf{B}^{*\prime}\mathbf{M}\mathbf{B}^* &= \tilde{\mathbf{B}}'\tilde{\mathbf{V}}^{-1}\tilde{\mathbf{B}} + \mathbf{R}'_{T+\kappa}\mathbf{R}_{T+\kappa} - \tilde{\mathbf{B}}'\tilde{\mathbf{V}}^{-1}\mathbf{M}^{-1}\tilde{\mathbf{V}}^{-1}\tilde{\mathbf{B}} \\
&\quad - \tilde{\mathbf{B}}'\tilde{\mathbf{V}}^{-1}\mathbf{M}^{-1}\mathbf{Z}'\mathbf{R}_{T+\kappa} - \mathbf{R}_{T+\kappa}\mathbf{Z}\mathbf{M}^{-1}\tilde{\mathbf{V}}^{-1}\tilde{\mathbf{B}} - \mathbf{R}'_{T+\kappa}\mathbf{Z}\mathbf{Z}'\mathbf{R}_{T+\kappa} \\
&= \tilde{\mathbf{B}}'(\tilde{\mathbf{V}}^{-1} - \tilde{\mathbf{V}}^{-1}\mathbf{M}^{-1}\tilde{\mathbf{V}}^{-1})\tilde{\mathbf{B}} - \mathbf{B}^{**\prime}\mathbf{C}\mathbf{B}^{**} \\
&\quad + (\mathbf{R}_{T+\kappa} - \mathbf{B}^{**})'\mathbf{C}(\mathbf{R}_{T+\kappa} - \mathbf{B}^{**}), \tag{1.7}
\end{aligned}$$

where  $\mathbf{C} = \mathbf{I} - \mathbf{Z}\mathbf{M}^{-1}\mathbf{Z}'$ ,  $\mathbf{C}^{-1} = \mathbf{I} + \mathbf{Z}\tilde{\mathbf{V}}\mathbf{Z}'$  and  $\mathbf{B}^{**} = \mathbf{C}^{-1}\mathbf{Z}\mathbf{M}^{-1}\tilde{\mathbf{V}}^{-1}\tilde{\mathbf{B}}$ . So, let us see what  $\mathbf{C}^{-1}\mathbf{Z}\mathbf{M}^{-1}$  is

$$\begin{aligned}
\mathbf{C}^{-1}\mathbf{Z}\mathbf{M}^{-1} &= [\mathbf{I} - \mathbf{Z}\mathbf{M}^{-1}\mathbf{Z}']^{-1}\mathbf{Z}\mathbf{M}^{-1} \\
&= \mathbf{Z}[\mathbf{I} + \tilde{\mathbf{V}}\mathbf{Z}'\mathbf{Z}]\mathbf{M}^{-1} \\
&= \mathbf{Z}\tilde{\mathbf{V}}(\tilde{\mathbf{V}}^{-1} + \mathbf{Z}'\mathbf{Z})\mathbf{M}^{-1} \\
&= \mathbf{Z}\tilde{\mathbf{V}}. \tag{1.8}
\end{aligned}$$

Then,  $\mathbf{B}^{**} = \mathbf{Z}\tilde{\mathbf{B}}$  and

$$\begin{aligned}
\tilde{\mathbf{B}}'(\tilde{\mathbf{V}}^{-1} - \tilde{\mathbf{V}}^{-1}\mathbf{M}^{-1}\tilde{\mathbf{V}}^{-1})\tilde{\mathbf{B}} - \mathbf{B}^{**\prime}\mathbf{C}\mathbf{B}^{**} &= \tilde{\mathbf{B}}'(\tilde{\mathbf{V}}^{-1} - \tilde{\mathbf{V}}^{-1}\mathbf{M}^{-1}\tilde{\mathbf{V}}^{-1} - \tilde{\mathbf{V}}^{-1}\mathbf{M}^{-1}\mathbf{Z}'\mathbf{C}^{-1}\mathbf{Z}\mathbf{M}^{-1}\tilde{\mathbf{V}}^{-1})\tilde{\mathbf{B}} \\
&= \tilde{\mathbf{B}}(\tilde{\mathbf{V}}^{-1} - \tilde{\mathbf{V}}^{-1}\mathbf{M}^{-1}[\mathbf{I} + \mathbf{Z}'\mathbf{Z}\tilde{\mathbf{V}}]\tilde{\mathbf{V}}^{-1})\tilde{\mathbf{B}} \\
&= \tilde{\mathbf{B}}(\tilde{\mathbf{V}}^{-1} - \tilde{\mathbf{V}}^{-1}\mathbf{M}^{-1}[\tilde{\mathbf{V}}^{-1} + \mathbf{Z}'\mathbf{Z}])\tilde{\mathbf{B}} \\
&= \tilde{\mathbf{B}}(\tilde{\mathbf{V}}^{-1} - \tilde{\mathbf{V}}^{-1}\mathbf{M}^{-1}\mathbf{M})\tilde{\mathbf{B}} \\
&= \tilde{\mathbf{B}}(\tilde{\mathbf{V}}^{-1} - \tilde{\mathbf{V}}^{-1})\tilde{\mathbf{B}} = \mathbf{0}. \tag{1.9}
\end{aligned}$$

Finally, by substituting (1.8) and (1.9) in (1.7) we get,

$$\tilde{\mathbf{H}} + \tilde{\mathbf{B}}'\tilde{\mathbf{V}}^{-1}\tilde{\mathbf{B}} + \mathbf{R}'_{T+\kappa}\mathbf{R}_{T+\kappa} - \mathbf{B}^{*\prime}\mathbf{M}\mathbf{B}^* = \tilde{\mathbf{H}} + (\mathbf{R}_{T+\kappa} - \mathbf{Z}\tilde{\mathbf{B}})'(\mathbf{I} - \mathbf{Z}\mathbf{M}^{-1}\mathbf{Z}')(\mathbf{R}_{T+\kappa} - \mathbf{Z}\tilde{\mathbf{B}}).$$

We can write the predictive pdf (1.6) as

$$p(\mathbf{R}_{T+\kappa} \mid \mathbf{R}, \mathbf{X}, \mathbf{Z}) \propto \left| \tilde{\mathbf{H}} + (\mathbf{R}_{T+\kappa} - \mathbf{Z}\tilde{\mathbf{B}})'(\mathbf{I} - \mathbf{Z}\mathbf{M}^{-1}\mathbf{Z}')(\mathbf{R}_{T+\kappa} - \mathbf{Z}\tilde{\mathbf{B}}) \right|^{-\frac{\tilde{\nu}+\kappa}{2}}. \tag{1.10}$$

The matrix of future observations has a pdf in the generalized multivariate Student- $t$  distribution with  $\tilde{\nu} + \kappa - N$  degrees of freedom.

This distribution was introduced by [3, 4] and is known as matrix  $t$  pdf. [1] present some properties of (1.10) but in our work we only use one of these properties.

Let

$$\mathbf{C} = \mathbf{I} - \mathbf{Z}\mathbf{M}^{-1}\mathbf{Z}' = \begin{bmatrix} \mathbf{C}_{11} & \mathbf{C}_{12} \\ \mathbf{C}_{21} & \mathbf{C}_{22} \end{bmatrix},$$

and

$$\mathbf{C}_{22 \cdot 1} = \mathbf{C}_{22} - \mathbf{C}_{21}\mathbf{C}_{11}^{-1}\mathbf{C}_{12}, \tag{1.11}$$

where  $\mathbf{C}_{11}$  is a block matrix of dimension  $p_1 \times p_1$ ,  $\mathbf{C}_{22}$  is of dimension  $p_2 \times p_2$ , and  $p_1 + p_2 = \kappa$ . Then, the marginal pdf for  $\mathbf{R}_{T+\kappa, p_2}$  is

$$p(\mathbf{R}_{T+\kappa; p_2} | \mathbf{R}, \mathbf{X}, \mathbf{Z}) \propto \left| \widetilde{\mathbf{H}} + (\mathbf{R}_{T+\kappa, p_2} - \mathbf{Z}_{p_2} \widetilde{\mathbf{B}})' (\mathbf{I} - \mathbf{Z}_{p_2} \mathbf{M}_{p_2}^{-1} \mathbf{Z}_{p_2}') (\mathbf{R}_{T+\kappa; p_2} - \mathbf{Z}_{p_2} \widetilde{\mathbf{B}}) \right|^{-\frac{\bar{\nu} + \kappa}{2}}. \quad (1.12)$$

In the last notation, the subindex  $\mathbf{R}_{T+\kappa, p_2}$  means the last  $p_2$  rows of the  $\mathbf{R}_{T+\kappa}$  matrix. In the particular case of Treynor–Black approach with  $p_2 = \kappa$ , the mean and variance of the predictive distribution are presented in equations 2.10 and 2.11 in our paper, respectively.

Observe that to get informative Bayesian estimates for  $\boldsymbol{\mu}_{T+\kappa}$  and  $\boldsymbol{\Sigma}_{T+\kappa}$  in the portfolio optimization problem, we can define the multivariate regression setting as

$$\mathbf{R} = \mathbf{1}\boldsymbol{\mu}' + \mathbf{U},$$

where  $\mathbf{R}$  is a  $T \times N$  matrix,  $\boldsymbol{\mu}$  a  $N \times 1$  vector,  $\mathbf{U}$  a  $T \times N$  matrix of disturbance terms. We use the following informative priors for the excess of return and the covariance matrix:

$$\begin{aligned} \boldsymbol{\mu} | \boldsymbol{\Sigma} &\sim N\left(\boldsymbol{\eta}, \frac{1}{\tau} \boldsymbol{\Sigma}\right), \\ \boldsymbol{\Sigma} &\sim IW(\boldsymbol{\Omega}, \nu). \end{aligned}$$

The likelihood function is

$$\mathcal{L}(\boldsymbol{\mu}, \boldsymbol{\Sigma} | \mathbf{R}) = |\boldsymbol{\Sigma}|^{-T/2} \exp\left\{-\frac{1}{2} \text{tr}[\mathbf{S} + T(\boldsymbol{\mu} - \hat{\boldsymbol{\mu}})(\boldsymbol{\mu} - \hat{\boldsymbol{\mu}})'] \boldsymbol{\Sigma}^{-1}\right\},$$

where  $\mathbf{S} = (\mathbf{R} - \mathbf{1}\hat{\boldsymbol{\mu}})'(\mathbf{R} - \mathbf{1}\hat{\boldsymbol{\mu}}')$  and  $\hat{\boldsymbol{\mu}}$  is the maximum likelihood estimator. The Bayes' rule implies

$$\begin{aligned} \pi(\boldsymbol{\mu}, \boldsymbol{\Sigma} | \mathbf{R}) &= \mathcal{L}(\boldsymbol{\mu}, \boldsymbol{\Sigma} | \mathbf{R}) \pi(\boldsymbol{\mu}, \boldsymbol{\Sigma}) \\ &= \mathcal{L}(\boldsymbol{\mu}, \boldsymbol{\Sigma} | \mathbf{R}) \pi(\boldsymbol{\mu} | \boldsymbol{\Sigma}) \pi(\boldsymbol{\Sigma}) \\ &= |\boldsymbol{\Sigma}|^{-\frac{T+\nu+N+2}{2}} \exp\left\{-\frac{1}{2} \text{tr}[\boldsymbol{\Omega} + \mathbf{S} + T(\boldsymbol{\mu} - \hat{\boldsymbol{\mu}})(\boldsymbol{\mu} - \hat{\boldsymbol{\mu}})' + \tau(\boldsymbol{\mu} - \boldsymbol{\eta})(\boldsymbol{\mu} - \boldsymbol{\eta})'] \boldsymbol{\Sigma}^{-1}\right\}. \end{aligned} \quad (1.13)$$

Expanding the last two terms in the exponential and completing squares in  $\boldsymbol{\mu}$ ,

$$\begin{aligned} T(\boldsymbol{\mu} - \hat{\boldsymbol{\mu}})(\boldsymbol{\mu} - \hat{\boldsymbol{\mu}})' + \tau(\boldsymbol{\mu} - \boldsymbol{\eta})(\boldsymbol{\mu} - \boldsymbol{\eta})' &= T[\boldsymbol{\mu}\boldsymbol{\mu}' - \boldsymbol{\mu}\hat{\boldsymbol{\mu}}' - \hat{\boldsymbol{\mu}}\boldsymbol{\mu}' + \hat{\boldsymbol{\mu}}\hat{\boldsymbol{\mu}}'] + \tau[\boldsymbol{\mu}\boldsymbol{\mu}' - \boldsymbol{\mu}\boldsymbol{\eta}' - \boldsymbol{\eta}\boldsymbol{\mu}' + \boldsymbol{\eta}\boldsymbol{\eta}'] \\ &= (T + \tau)\boldsymbol{\mu}\boldsymbol{\mu}' - 2(T\boldsymbol{\mu}\hat{\boldsymbol{\mu}}' + \tau\boldsymbol{\eta}\boldsymbol{\eta}') + T\hat{\boldsymbol{\mu}}\hat{\boldsymbol{\mu}}' + \tau\boldsymbol{\eta}\boldsymbol{\eta}' \\ &= (T + \tau)(\boldsymbol{\mu} - \tilde{\boldsymbol{\mu}})(\boldsymbol{\mu} - \tilde{\boldsymbol{\mu}})' + T\hat{\boldsymbol{\mu}}\hat{\boldsymbol{\mu}}' + \tau\boldsymbol{\eta}\boldsymbol{\eta}' - (T + \tau)\tilde{\boldsymbol{\mu}}\tilde{\boldsymbol{\mu}}' \\ &= (T + \tau)(\boldsymbol{\mu} - \tilde{\boldsymbol{\mu}})(\boldsymbol{\mu} - \tilde{\boldsymbol{\mu}})' + T\hat{\boldsymbol{\mu}}\hat{\boldsymbol{\mu}}' + \tau\boldsymbol{\eta}\boldsymbol{\eta}' - \frac{1}{T + \tau}(T\hat{\boldsymbol{\mu}} + \tau\boldsymbol{\eta})(T\hat{\boldsymbol{\mu}} + \tau\boldsymbol{\eta}) \\ &= (T + \tau)(\boldsymbol{\mu} - \tilde{\boldsymbol{\mu}})(\boldsymbol{\mu} - \tilde{\boldsymbol{\mu}})' + \frac{T\tau}{T + \tau}(\hat{\boldsymbol{\mu}} - \boldsymbol{\eta})(\hat{\boldsymbol{\mu}} - \boldsymbol{\eta})', \end{aligned}$$

where  $\tilde{\boldsymbol{\mu}} = \frac{T}{T+\tau}\hat{\boldsymbol{\mu}} + \frac{\tau}{T+\tau}\boldsymbol{\eta}$ , a weighted average between the prior mean and the sample mean of the returns. Then, equation (1.13) is:

$$\begin{aligned} & |\boldsymbol{\Sigma}|^{-\frac{T+\nu+N+2}{2}} \exp \left\{ -\frac{1}{2} \text{tr} \left[ \boldsymbol{\Omega} + (T-1)\widehat{\boldsymbol{\Sigma}} + (T+\tau)(\boldsymbol{\mu} - \tilde{\boldsymbol{\mu}})(\boldsymbol{\mu} - \tilde{\boldsymbol{\mu}})' + \frac{T\tau}{T+\tau}(\hat{\boldsymbol{\mu}} - \boldsymbol{\eta})(\hat{\boldsymbol{\mu}} - \boldsymbol{\eta})' \right] \boldsymbol{\Sigma}^{-1} \right\} \\ &= |\boldsymbol{\Sigma}|^{-\frac{1}{2}} \exp \left\{ -\frac{1}{2} \text{tr} \left[ (T+\tau)(\boldsymbol{\mu} - \tilde{\boldsymbol{\mu}})(\boldsymbol{\mu} - \tilde{\boldsymbol{\mu}})' \right] \boldsymbol{\Sigma}^{-1} \right\} \\ &\times |\boldsymbol{\Sigma}|^{-\frac{T+\nu+N+1}{2}} \exp \left\{ -\frac{1}{2} \text{tr} \left[ \boldsymbol{\Omega} + (T-1)\widehat{\boldsymbol{\Sigma}} + \frac{T\tau}{T+\tau}(\hat{\boldsymbol{\mu}} - \boldsymbol{\eta})(\hat{\boldsymbol{\mu}} - \boldsymbol{\eta})' \right] \boldsymbol{\Sigma}^{-1} \right\}. \end{aligned}$$

Thus

$$\pi(\boldsymbol{\mu}, \boldsymbol{\Sigma} \mid \mathbf{R}) = \pi(\boldsymbol{\mu} \mid \boldsymbol{\Sigma}, \mathbf{R}) \times \pi(\boldsymbol{\Sigma} \mid \mathbf{R}),$$

where

$$\begin{aligned} \boldsymbol{\mu} \mid \boldsymbol{\Sigma}, \mathbf{R} &\sim N \left( \tilde{\boldsymbol{\mu}}, \frac{1}{T+\tau} \boldsymbol{\Sigma} \right), \\ \boldsymbol{\Sigma} \mid \mathbf{R} &\sim IW \left( \tilde{\boldsymbol{\Omega}}, \tilde{\nu} \right), \end{aligned}$$

where  $\tilde{\boldsymbol{\Omega}} = \boldsymbol{\Omega} + (T-1)\widehat{\boldsymbol{\Sigma}} + \frac{T\tau}{T+\tau}(\hat{\boldsymbol{\mu}} - \boldsymbol{\eta})(\hat{\boldsymbol{\mu}} - \boldsymbol{\eta})'$  and  $\tilde{\nu} = \nu + T$ .

Then, setting  $\tilde{\mathbf{H}} = \tilde{\boldsymbol{\Omega}}$ ,  $\tilde{\nu} = T + \nu$ ,  $\tilde{\mathbf{B}} = \tilde{\boldsymbol{\mu}}$ ,  $\mathbf{Z} = \mathbf{1}_\kappa$ , and  $\tilde{\mathbf{V}} = \frac{1}{T+\tau}$  in the equation (1.10), we have the following specification for the predictive distribution

$$p(\mathbf{R}_{T+\kappa} \mid \mathbf{R}) \propto \left| \tilde{\boldsymbol{\Omega}} + (\mathbf{R}_{T+\kappa} - \mathbf{1}_\kappa \tilde{\boldsymbol{\mu}})' \left( \mathbf{I}_\kappa - \frac{\mathbf{1}_\kappa \mathbf{1}_\kappa'}{T+\tau+\kappa} \right) (\mathbf{R}_{T+\kappa} - \mathbf{1}_\kappa \tilde{\boldsymbol{\mu}}) \right|^{-\frac{T+\nu+\kappa-1}{2}}$$

This is a multivariate Student's t-distribution with  $T + \nu + \kappa - N$  degrees of freedom.

The following step is to use the marginal distribution described in equation (1.12) with  $p_1 = \kappa - 1$ .

Thus, the marginal pdf for the  $\kappa$ -row of  $\mathbf{R}_{T+\kappa}$  is given by

$$p(\mathbf{R}_{T+\kappa;\kappa} \mid \mathbf{R}) \propto \left| 1 + \mathbf{C}_{22 \cdot 1} (\mathbf{R}_{T+\kappa;\kappa} - \tilde{\boldsymbol{\mu}})' \tilde{\boldsymbol{\Omega}}^{-1} (\mathbf{R}_{T+\kappa;\kappa} - \tilde{\boldsymbol{\mu}}) \right|^{-\frac{T+\nu+\kappa-1}{2}},$$

where

$$\mathbf{C}_{22 \cdot 1} = \frac{(T+\tau)(T+\tau+\kappa)(T+\tau+\kappa-1) - (\kappa-1)(T+\tau-\kappa+1)}{(T+\tau)(T+\tau+\kappa)^2}.$$

Thus, the mean and variance of the distribution are presented in equation 2.8 and 2.9 in our paper, respectively.

## 1.2 Non-informative priors

The non-informative case uses a Jeffrey's type prior

$$\pi(\mathbf{B}, \boldsymbol{\Sigma}) \propto |\boldsymbol{\Sigma}|^{-(N+1)/2}.$$

Then, the conditional posterior distributions are

$$\begin{aligned} \pi(\mathbf{B} \mid \boldsymbol{\Sigma}, \mathbf{R}) &\sim N(\widehat{\mathbf{B}}, \boldsymbol{\Sigma} \otimes (\mathbf{X}'\mathbf{X})^{-1}), \\ \pi(\boldsymbol{\Sigma} \mid \mathbf{R}) &\sim IW(\mathbf{S}, T-2). \end{aligned}$$

By setting  $\widetilde{\mathbf{H}} = \mathbf{S}$ ,  $\tilde{\nu} = T - 2$ ,  $\widetilde{\mathbf{B}} = \widehat{\mathbf{B}}$ , and  $\widetilde{\mathbf{V}} = (\mathbf{X}'\mathbf{X})^{-1}$  in the equation (1.10) we have the following specification for the predictive distribution

$$p(\mathbf{R}_{T+\kappa} | \mathbf{R}) \propto \left| \mathbf{S} + (\mathbf{R}_{T+\kappa} - \mathbf{Z}\widehat{\mathbf{B}})' \mathbf{C} (\mathbf{R}_{T+\kappa} - \mathbf{Z}\widehat{\mathbf{B}}) \right|^{-\frac{T+\kappa-2}{2}},$$

where  $\mathbf{C} = \mathbf{I} - \mathbf{Z}\mathbf{M}^{-1}\mathbf{Z}'$ .

This is a multivariate student-t distribution with  $T + \kappa - N - 2$  degrees of freedom.

The following step is using the marginal distribution described in equation (1.12) with  $p_1 = \kappa - 1$ .

Thus, the marginal pdf for the  $\kappa$ -row of  $\mathbf{R}_{T+\kappa}$  is given by

$$p(\mathbf{R}_{T+\kappa;\kappa} | \mathbf{R}) \propto \left| 1 + \mathbf{C}_{22\cdot 1} (\mathbf{R}_{T+\kappa;\kappa} - \mathbf{Z}_\kappa \widehat{\boldsymbol{\mu}})' \mathbf{S}^{-1} (\mathbf{R}_{T+\kappa;\kappa} - \mathbf{Z}_\kappa \widehat{\boldsymbol{\mu}}) \right|^{-\frac{T+\nu+\kappa-1}{2}},$$

where  $\mathbf{C}_{22\cdot 1}$  defined as in equation (1.11). The mean and variance of the distribution are presented in equations 2.6 and 2.7 in our paper, respectively.

Observe that to get non-informative Bayesian estimates for  $\boldsymbol{\mu}_{T+\kappa}$  and  $\boldsymbol{\Sigma}_{T+\kappa}$ , we can again define the multivariate regression setting as

$$\mathbf{R} = \mathbf{1}\boldsymbol{\mu}' + \mathbf{U},$$

where  $\boldsymbol{\mu}' = \mathbf{B}$  a  $1 \times N$  vector,  $\mathbf{1} = \mathbf{X}$ , and  $k = 1$ . The likelihood function is given by

$$\mathcal{L}(\boldsymbol{\mu}, \boldsymbol{\Sigma}) \propto |\boldsymbol{\Sigma}|^{-T/2} \exp \left\{ -\frac{1}{2} \text{tr} [S + T(\boldsymbol{\mu} - \widehat{\boldsymbol{\mu}})'(\boldsymbol{\mu} - \widehat{\boldsymbol{\mu}})] \boldsymbol{\Sigma}^{-1} \right\},$$

where  $S \equiv (\mathbf{R} - \mathbf{1}\widehat{\boldsymbol{\mu}})'(\mathbf{R} - \mathbf{1}\widehat{\boldsymbol{\mu}})$  and  $\widehat{\boldsymbol{\mu}} \equiv \frac{1}{T} \sum_{t=1}^T \mathbf{R}_t$ .

Now, if we consider the non-informative prior,  $\pi(\boldsymbol{\mu}, \boldsymbol{\Sigma}) \propto |\boldsymbol{\Sigma}|^{-(N+1)/2}$ , then the joint posterior distribution is

$$\pi(\boldsymbol{\mu}, \boldsymbol{\Sigma} | \mathbf{R}) \propto |\boldsymbol{\Sigma}|^{-(N+T+1)/2} \exp \left\{ -\frac{1}{2} \text{tr} [S + T(\boldsymbol{\mu} - \widehat{\boldsymbol{\mu}})'(\boldsymbol{\mu} - \widehat{\boldsymbol{\mu}})] \boldsymbol{\Sigma}^{-1} \right\}.$$

Thus, the marginal conditional distributions are

$$\begin{aligned} \pi(\boldsymbol{\mu} | \boldsymbol{\Sigma}, \mathbf{R}) &\sim N \left( \widehat{\boldsymbol{\mu}}, \frac{1}{T} \boldsymbol{\Sigma} \right), \\ \pi(\boldsymbol{\Sigma} | \mathbf{R}) &\sim IW(S, T - 1). \end{aligned}$$

Then, by setting  $\widetilde{\mathbf{H}} = \mathbf{S}$ ,  $\tilde{\nu} = T - 1$ ,  $\widetilde{\mathbf{B}} = \widehat{\boldsymbol{\mu}}$ ,  $\mathbf{Z} = \mathbf{1}_\kappa$ , and  $\widetilde{\mathbf{V}} = \frac{1}{T}$  in the equation (1.10), we have the following specification for the predictive distribution

$$p(\mathbf{R}_{T+\kappa} | \mathbf{R}) \propto \left| \mathbf{S} + (\mathbf{R}_{T+\kappa} - \mathbf{1}\widehat{\boldsymbol{\mu}})' \left( \mathbf{I}_\kappa - \frac{\mathbf{1}_\kappa \mathbf{1}_\kappa'}{T + \kappa} \right) (\mathbf{R}_{T+\kappa} - \mathbf{1}\widehat{\boldsymbol{\mu}}) \right|^{-\frac{T+\kappa-1}{2}}.$$

This is a multivariate Student's t-distribution with  $T + \kappa - N - 1$  degrees of freedom.

The following step is to use the marginal distribution described in equation (1.12) with  $p_1 = \kappa - 1$ .

Thus, the marginal pdf for the  $\kappa$ -row of  $\mathbf{R}_{T+\kappa}$  is given by

$$p(\mathbf{R}_{T+\kappa;\kappa} | \mathbf{R}) \propto \left| 1 + \mathbf{C}_{22\cdot 1} (\mathbf{R}_{T+\kappa;\kappa} - \widehat{\boldsymbol{\mu}})' \mathbf{S}^{-1} (\mathbf{R}_{T+\kappa;\kappa} - \widehat{\boldsymbol{\mu}}) \right|^{-\frac{T+\kappa-1}{2}},$$

where

$$\mathbf{C}_{22\cdot 1} = \frac{T(T + \kappa)(T + \kappa - 1) - (\kappa - 1)(T - \kappa + 1)}{T(T + \kappa)^2}.$$

whose mean and variance are equations 2.4 and 2.5 in our paper, respectively.

## 2 Minimum expected loss estimator for trading strategies

### 2.1 Assumptions

Let  $\mathbf{R}_1, \mathbf{R}_2, \dots, \mathbf{R}_T$  be iid each with density  $f(\mathbf{R}|\boldsymbol{\theta})$  with respect to a  $\sigma$ -finite measure  $\mu$ , where  $\boldsymbol{\theta}$  is real-valued, and suppose the following regularity conditions hold.

#### A. Likelihood

1. The parameter space  $\Theta$  is an open subset of  $\mathbb{R}^L$ .
2. The set  $A = \{\mathbf{R} : f(\mathbf{R}|\boldsymbol{\theta}) > 0\}$  is independent of  $\boldsymbol{\theta}$ .
3. For every  $\mathbf{R} \in A$ , the density  $f(\mathbf{R}|\boldsymbol{\theta})$  is twice differentiable with respect to  $\boldsymbol{\theta}$ , and the second derivative is continuous in  $\boldsymbol{\theta}$ .
4. The Fisher information  $I(\boldsymbol{\theta}) = \mathbb{E}_{\boldsymbol{\theta}} \left[ \frac{\partial}{\partial \boldsymbol{\theta}} \log f(\mathbf{R}|\boldsymbol{\theta}) \frac{\partial}{\partial \boldsymbol{\theta}'} \log f(\mathbf{R}|\boldsymbol{\theta}) \right]$  satisfies  $0 < [I(\boldsymbol{\theta})_{ij}] < \infty, i, j = 1, 2, \dots, L$ , where  $[A_{ij}]$  denotes element  $ij$  of matrix  $\mathbf{A}$ .
5. The integral  $\int f(\mathbf{R}|\boldsymbol{\theta}) d\mu(\mathbf{R})$  can be twice differentiated with respect to  $\boldsymbol{\theta}$  under the integral sign. This ensures that for all  $\boldsymbol{\theta} \in \Theta$ ,  $E \left[ \frac{\partial}{\partial \boldsymbol{\theta}} \log f(\mathbf{R}|\boldsymbol{\theta}) \right] = \mathbf{0}$  and  $E \left[ -\frac{\partial^2}{\partial \boldsymbol{\theta} \partial \boldsymbol{\theta}'} \log f(\mathbf{R}|\boldsymbol{\theta}) \right] = I(\boldsymbol{\theta})$ .
6. For any given  $\boldsymbol{\theta}_0 \in \Theta$ , there exists a positive number  $c$  and a function  $M(\mathbf{R})$  (both of which may depend on  $\boldsymbol{\theta}_0$ ) such that  $|\partial^2 \log f(\mathbf{R}|\boldsymbol{\theta}) / \partial \theta_i \partial \theta_j| \leq M(\mathbf{R})$  for all  $\mathbf{R} \in A$ ,  $\|\boldsymbol{\theta} - \boldsymbol{\theta}_0\| < c$ , where  $\|\cdot\|$  is the Euclidean norm, and  $\mathbb{E}_{\boldsymbol{\theta}_0} M(\mathbf{R}) < \infty$ .

Under these assumptions, it is well-known that the maximum likelihood estimator satisfies  $\sqrt{T}(\hat{\boldsymbol{\theta}} - \boldsymbol{\theta}_0) \xrightarrow{d} N(0, I(\boldsymbol{\theta}_0)^{-1})$ , that is,  $\hat{\boldsymbol{\theta}}$  is consistent for the true value  $\boldsymbol{\theta}_0$ , and asymptotically efficient ([5]). Then,  $\frac{1}{T}[R_T(\boldsymbol{\theta})_{ij}] \xrightarrow{p} \mathbf{0}$  in the second order Taylor series expansion

$$l(\boldsymbol{\theta}) = l(\boldsymbol{\theta}_0) + (\boldsymbol{\theta} - \boldsymbol{\theta}_0)' \frac{\partial l}{\partial \boldsymbol{\theta}} \Big|_{\boldsymbol{\theta}_0} + \frac{1}{2} (\boldsymbol{\theta} - \boldsymbol{\theta}_0)' [TI(\boldsymbol{\theta}_0) + R_T(\boldsymbol{\theta})] (\boldsymbol{\theta} - \boldsymbol{\theta}_0) \quad (2.1)$$

where  $l(\boldsymbol{\theta}) = \log(f(\mathbf{R}|\boldsymbol{\theta}))$  is the log likelihood,  $\mathbf{R} = [R_1, R_2, \dots, R_T]$ . However, Bayesian estimators involve an integral over the whole range of  $\boldsymbol{\theta}$  values, this necessitates the following assumption.

#### B. Taylor series expansion

1. Given any  $\epsilon > 0$ , there exist  $\delta > 0$  such that in the expansion 2.1,

$$\lim_{T \rightarrow \infty} P \left( \sup \left\{ \left| \frac{1}{T} [R_T(\boldsymbol{\theta})_{ij}] \right| : \|\boldsymbol{\theta} - \boldsymbol{\theta}_0\| \leq \delta \right\} \geq \epsilon \right) = 0.$$

#### C. Log likelihood bounded contribution

1. For any  $\delta > 0$ , there exist  $\epsilon > 0$  such that

$$\lim_{T \rightarrow \infty} P \left( \sup \left\{ \frac{1}{T} [l(\boldsymbol{\theta}) - l(\boldsymbol{\theta}_0)] : \|\boldsymbol{\theta} - \boldsymbol{\theta}_0\| \geq \delta \right\} \leq -\epsilon \right) = 1.$$

This assumption implies that the log likelihood contribution of  $\boldsymbol{\theta} \notin \mathcal{B}_\delta(\boldsymbol{\theta}_0)$ , where  $\mathcal{B}_\delta(\boldsymbol{\theta}_0)$  is an open ball centered at  $\boldsymbol{\theta}_0$  with radius  $\delta$ , is negligible as  $T \rightarrow \infty$ .



#### D. Prior density

1. The prior density  $\pi(\boldsymbol{\theta})$  is continuous and positive for all  $\boldsymbol{\theta} \in \boldsymbol{\Theta}$ .
2. The expectation and second moment of  $\boldsymbol{\theta}$  under  $\pi$  exists; that is,  $\int \|\boldsymbol{\theta}\|^2 \pi(\boldsymbol{\theta}) d\boldsymbol{\theta} < \infty$ .

The first assumption implies  $\pi(\boldsymbol{\theta}_0) > 0$ , so  $\boldsymbol{\theta}_0$  is not a priori excluded. The second assumption is required to proof that the minimum expected loss estimator is consistent and asymptotically efficient. We assume that there is a proper prior density function. However, result 2.2 can be extended to the case  $\int \pi(\boldsymbol{\theta}) d\boldsymbol{\theta} = \infty$  when there is  $n_0$ , such that the posterior density taking information up to this point is a proper density with probability 1, satisfying assumptions **D**.

#### E. Objective function

1.  $g_i(\boldsymbol{\theta}) = \frac{l_i(\boldsymbol{\theta})}{m(\boldsymbol{\theta})} : \mathbb{R}^L \rightarrow \mathbb{R}$  is a function with finite and nonzero first order derivative at  $\boldsymbol{\theta}_0$ ,  $l_i(\boldsymbol{\theta})$  and  $m(\boldsymbol{\theta}) \neq 0$  are polynomial functions in  $\boldsymbol{\theta}$ , and  $g_i(\boldsymbol{\theta}_0) \neq 0$ , such that  $g_i(\boldsymbol{\theta}) = g_i(\boldsymbol{\theta}_0) + (\boldsymbol{\theta} - \boldsymbol{\theta}_0)'[\nabla g_i(\boldsymbol{\theta}_0) + W_T(\boldsymbol{\theta})]$ , and  $\sup \{\|W_T(\boldsymbol{\theta})\| : \boldsymbol{\theta} \in \boldsymbol{\Theta}\} < c_1 < \infty, T \rightarrow \infty$ .

#### F. Weighting functions

1.  $h(\boldsymbol{\theta}) : \mathbb{R}^L \rightarrow \mathbb{R}^{++}$  is a function with finite and nonzero first order derivative at  $\boldsymbol{\theta}_0$ , continuous first order derivative, and  $h(\boldsymbol{\theta}_0) \neq 0$ , such that  $h(\boldsymbol{\theta}) = h(\boldsymbol{\theta}_0) + (\boldsymbol{\theta} - \boldsymbol{\theta}_0)'[\nabla h(\boldsymbol{\theta}_0) + V_T(\boldsymbol{\theta})]$ , and  $\sup \{\|V_T(\boldsymbol{\theta})\| : \boldsymbol{\theta} \in \boldsymbol{\Theta}\} < c_2 < \infty, T \rightarrow \infty$ .

It is well known that assuming **A** to **D**, if  $\pi^*(\mathbf{u}|\mathbf{R})$  is the posterior density of  $\mathbf{u} = \sqrt{T}(\boldsymbol{\theta} - \hat{\boldsymbol{\theta}})$ , then

$$\int (1 + \|\mathbf{u}\|^r) |\pi^*(\mathbf{u}|\mathbf{R}) - \phi(\mathbf{I}(\boldsymbol{\theta}_0)^{-1}, \mathbf{u})| d\mathbf{u} \xrightarrow{P} 0, \quad 0 \leq r \leq 2, \quad (2.2)$$

where  $\phi(B, \mathbf{x})$  is the density function of a multivariate normal distribution with mean  $\mathbf{0}$  and covariance matrix  $B$  ([6, 5]).

### 2.2 Proof of Proposition 1

*Proof* Given the loss function  $\mathcal{L}(\boldsymbol{\theta}, \hat{\omega}) = h(\boldsymbol{\theta})(\hat{\omega} - \mathbf{g}(\boldsymbol{\theta}))'(\hat{\omega} - \mathbf{g}(\boldsymbol{\theta}))$ , the posterior expected value of the loss function is

$$\mathbb{E}_{\pi(\boldsymbol{\theta}|\mathbf{R})} \{\mathcal{L}(\boldsymbol{\theta}, \hat{\omega})\} = \hat{\omega}' \hat{\omega} \mathbb{E}_{\pi(\boldsymbol{\theta}|\mathbf{R})} \{h(\boldsymbol{\theta})\} - 2\hat{\omega}' \mathbb{E}_{\pi(\boldsymbol{\theta}|\mathbf{R})} \{h(\boldsymbol{\theta})\mathbf{g}(\boldsymbol{\theta})\} + \mathbb{E}_{\pi(\boldsymbol{\theta}|\mathbf{R})} \{h(\boldsymbol{\theta})\mathbf{g}(\boldsymbol{\theta})'\mathbf{g}(\boldsymbol{\theta})\}$$

then

$$\frac{\partial \mathbb{E}_{\pi(\boldsymbol{\theta}|\mathbf{R})} \{\mathcal{L}(\boldsymbol{\theta}, \hat{\omega})\}}{\partial \hat{\omega}} = -2\mathbb{E}_{\pi(\boldsymbol{\theta}|\mathbf{R})} \{h(\boldsymbol{\theta})\mathbf{g}(\boldsymbol{\theta})\} + 2\hat{\omega}^* \mathbb{E}_{\pi(\boldsymbol{\theta}|\mathbf{R})} \{h(\boldsymbol{\theta})\} = \mathbf{0}$$

so,

$$\hat{\omega}^* = \frac{\mathbb{E}_{\pi(\boldsymbol{\theta}|\mathbf{R})} [\mathbf{g}(\boldsymbol{\theta})h(\boldsymbol{\theta})]}{\mathbb{E}_{\pi(\boldsymbol{\theta}|\mathbf{R})} [h(\boldsymbol{\theta})]}.$$

Observe that

$$\frac{\partial^2 \mathbb{E}_{\pi(\boldsymbol{\theta}|\mathbf{R})} \{\mathcal{L}(\boldsymbol{\theta}, \hat{\omega})\}}{\partial \hat{\omega} \partial \hat{\omega}'} = 2\mathbb{E}_{\pi(\boldsymbol{\theta}|\mathbf{R})} \{h(\boldsymbol{\theta})\} > 0$$

### 2.3 Proof of Proposition 2

To prove 1 in Proposition 2 we have that assumptions **E** and **F** imply  $\mathbf{g}(\boldsymbol{\theta})$  and  $h(\boldsymbol{\theta})$  are constant order functions (for instance  $\mathbf{g}(\boldsymbol{\theta}) = O(1)$  and  $1/\mathbf{g}(\boldsymbol{\theta}) = O(1)$ ), then  $\mathbb{E}_{\pi(\boldsymbol{\theta}|\mathbf{R})}(\mathbf{g}(\boldsymbol{\theta})h(\boldsymbol{\theta})) = \mathbf{g}(\hat{\boldsymbol{\theta}})h(\hat{\boldsymbol{\theta}})(1 + O(T^{-1}))$  and  $\mathbb{E}_{\pi(\boldsymbol{\theta}|\mathbf{R})}(h(\boldsymbol{\theta})) = h(\hat{\boldsymbol{\theta}})(1 + O(T^{-1}))$  [7], where  $\hat{\boldsymbol{\theta}}$  is the maximum likelihood estimator. Then,

$$\begin{aligned}\hat{\omega}^* &= \frac{\mathbb{E}_{\pi(\boldsymbol{\theta}|\mathbf{R})}[\mathbf{g}(\boldsymbol{\theta})h(\boldsymbol{\theta})]}{\mathbb{E}_{\pi(\boldsymbol{\theta}|\mathbf{R})}[h(\boldsymbol{\theta})]} \\ &= \frac{\mathbf{g}(\hat{\boldsymbol{\theta}})h(\hat{\boldsymbol{\theta}})(1 + O(T^{-1}))}{h(\hat{\boldsymbol{\theta}})(1 + O(T^{-1}))} \\ &= \mathbf{g}(\hat{\boldsymbol{\theta}})(1 + O(T^{-1})) \\ &= \mathbf{g}(\hat{\boldsymbol{\theta}}) + o(1).\end{aligned}$$

To prove 2 in Proposition 2<sup>2</sup>

$$\sqrt{T}(\hat{\omega}^* - g(\boldsymbol{\theta}_0)) = \sqrt{T}(\hat{\omega}^* - g(\hat{\boldsymbol{\theta}})) + \sqrt{T}(g(\hat{\boldsymbol{\theta}}) - g(\boldsymbol{\theta}_0)),$$

Given that  $\sqrt{T}(\hat{\boldsymbol{\theta}} - \boldsymbol{\theta}_0) \xrightarrow{d} N(\mathbf{0}, [I(\boldsymbol{\theta}_0)]^{-1})$ , then  $\sqrt{T}(g(\hat{\boldsymbol{\theta}}) - g(\boldsymbol{\theta}_0)) \xrightarrow{d} N(\mathbf{0}, \nabla g(\boldsymbol{\theta}_0)'[I(\boldsymbol{\theta}_0)]^{-1}g(\boldsymbol{\theta}_0))$  by the delta method. Consequently, it only remains to show that  $\sqrt{T}(\hat{\omega}^* - g(\hat{\boldsymbol{\theta}})) \xrightarrow{p} 0$  by Slutsky's theorem.

Setting  $\hat{h} = \int h(\boldsymbol{\theta})\pi(\boldsymbol{\theta}|\mathbf{R})d\boldsymbol{\theta}$ ,  $\mathbf{u} = \sqrt{T}(\boldsymbol{\theta} - \hat{\boldsymbol{\theta}})$ , then  $\pi^*(\mathbf{u}|\mathbf{R}) = \pi\left(\frac{\mathbf{u}}{\sqrt{T}} + \hat{\boldsymbol{\theta}}|\mathbf{R}\right)\frac{1}{\sqrt{T}}$ . Using a change of variable and taking into account **E** and **F** such that we make a Taylor expansion for  $h(\boldsymbol{\theta})$

---

<sup>2</sup> We prove this for an specific weight associated with asset  $i$  to facilitate exposition. We set  $g_i(\boldsymbol{\theta}) = g(\boldsymbol{\theta})$  to simplify notation in this proof. In addition,  $c_1 = \sup_{\boldsymbol{\theta} \in \Theta} |W_N(\boldsymbol{\theta})|$  and  $c_2 = \sup_{\boldsymbol{\theta} \in \Theta} |V_N(\boldsymbol{\theta})|$ .

at  $\boldsymbol{\theta}_0$ , and for  $g(\boldsymbol{\theta})$  at  $\hat{\boldsymbol{\theta}}$ ,

$$\begin{aligned}
\sqrt{T}|\hat{\omega}^* - g(\hat{\boldsymbol{\theta}})| &= \frac{1}{\hat{h}} \left| h(\boldsymbol{\theta}_0) \int \mathbf{u}' \left[ \nabla g(\hat{\boldsymbol{\theta}}) + W_T \left( \frac{\mathbf{u}}{\sqrt{T}} + \hat{\boldsymbol{\theta}} \right) \right] \pi^*(\mathbf{u}|\mathbf{R}) d\mathbf{u} + \right. \\
&\quad \left. \frac{1}{\sqrt{T}} \int (\mathbf{u} + \hat{\boldsymbol{\theta}} - \boldsymbol{\theta}_0)' \left[ \nabla h(\boldsymbol{\theta}_0) + V_T \left( \frac{\mathbf{u}}{\sqrt{T}} + \hat{\boldsymbol{\theta}} \right) \right] \mathbf{u}' \times \right. \\
&\quad \left. \left[ \nabla g(\hat{\boldsymbol{\theta}}) + W_T \left( \frac{\mathbf{u}}{\sqrt{T}} + \hat{\boldsymbol{\theta}} \right) \right] \pi^*(\mathbf{u}|\mathbf{R}) d\mathbf{u} \right| \\
&\leq \frac{1}{\hat{h}} \left\{ h(\boldsymbol{\theta}_0) \left| \left\{ \int \mathbf{u}' (\pi^*(\mathbf{u}|\mathbf{R}) - \phi(\mathbf{I}(\boldsymbol{\theta}_0)^{-1}, \mathbf{u})) d\mathbf{u} \right\} \nabla g(\hat{\boldsymbol{\theta}}) \right| \right. \\
&\quad \left. + h(\boldsymbol{\theta}_0) \left| \left\{ \int \mathbf{u}' (\pi^*(\mathbf{u}|\mathbf{R}) - \phi(\mathbf{I}(\boldsymbol{\theta}_0)^{-1}, \mathbf{u})) d\mathbf{u} \right\} \mathbf{c}_1 \right| \right. \\
&\quad \left. + \frac{1}{\sqrt{T}} \left| \nabla h(\boldsymbol{\theta}_0)' \left( \int \mathbf{u} \mathbf{u}' (\pi^*(\mathbf{u}|\mathbf{R}) - \phi(\mathbf{I}(\boldsymbol{\theta}_0)^{-1}, \mathbf{u})) d\mathbf{u} + \mathbf{I}(\boldsymbol{\theta}_0)^{-1} \right) \nabla g(\hat{\boldsymbol{\theta}}) \right| \right. \\
&\quad \left. + \frac{1}{\sqrt{T}} \left| \mathbf{c}_2' \left( \int \mathbf{u} \mathbf{u}' (\pi^*(\mathbf{u}|\mathbf{R}) - \phi(\mathbf{I}(\boldsymbol{\theta}_0)^{-1}, \mathbf{u})) d\mathbf{u} + \mathbf{I}(\boldsymbol{\theta}_0)^{-1} \right) \nabla g(\hat{\boldsymbol{\theta}}) \right| \right. \\
&\quad \left. + \frac{1}{\sqrt{T}} \left| \nabla h(\boldsymbol{\theta}_0)' \left( \int \mathbf{u} \mathbf{u}' (\pi^*(\mathbf{u}|\mathbf{R}) - \phi(\mathbf{I}(\boldsymbol{\theta}_0)^{-1}, \mathbf{u})) d\mathbf{u} + \mathbf{I}(\boldsymbol{\theta}_0)^{-1} \right) \mathbf{c}_1 \right| \right. \\
&\quad \left. + \frac{1}{\sqrt{T}} \left| \mathbf{c}_2' \left( \int \mathbf{u} \mathbf{u}' (\pi^*(\mathbf{u}|\mathbf{R}) - \phi(\mathbf{I}(\boldsymbol{\theta}_0)^{-1}, \mathbf{u})) d\mathbf{u} + \mathbf{I}(\boldsymbol{\theta}_0)^{-1} \right) \mathbf{c}_1 \right| \right. \\
&\quad \left. + \frac{1}{\sqrt{T}} \left| (\hat{\boldsymbol{\theta}} - \boldsymbol{\theta}_0)' \nabla h(\boldsymbol{\theta}_0) \int \{ \mathbf{u}' (\pi^*(\mathbf{u}|\mathbf{R}) - \phi(\mathbf{I}(\boldsymbol{\theta}_0)^{-1}, \mathbf{u})) d\mathbf{u} \} \nabla g(\hat{\boldsymbol{\theta}}) \right| \right. \\
&\quad \left. + \frac{1}{\sqrt{T}} \left| (\hat{\boldsymbol{\theta}} - \boldsymbol{\theta}_0)' \mathbf{c}_2 \int \{ \mathbf{u}' (\pi^*(\mathbf{u}|\mathbf{R}) - \phi(\mathbf{I}(\boldsymbol{\theta}_0)^{-1}, \mathbf{u})) d\mathbf{u} \} \nabla g(\hat{\boldsymbol{\theta}}) \right| \right. \\
&\quad \left. + \frac{1}{\sqrt{T}} \left| (\hat{\boldsymbol{\theta}} - \boldsymbol{\theta}_0)' \nabla h(\boldsymbol{\theta}_0) \int \{ \mathbf{u}' (\pi^*(\mathbf{u}|\mathbf{R}) - \phi(\mathbf{I}(\boldsymbol{\theta}_0)^{-1}, \mathbf{u})) d\mathbf{u} \} \mathbf{c}_1 \right| \right. \\
&\quad \left. + \frac{1}{\sqrt{T}} \left| (\hat{\boldsymbol{\theta}} - \boldsymbol{\theta}_0)' \mathbf{c}_2 \int \{ \mathbf{u}' (\pi^*(\mathbf{u}|\mathbf{R}) - \phi(\mathbf{I}(\boldsymbol{\theta}_0)^{-1}, \mathbf{u})) d\mathbf{u} \} \mathbf{c}_1 \right| \right\},
\end{aligned}$$

then,

$$\begin{aligned}
\sqrt{T}(\hat{\omega}^* - g(\hat{\theta})) &\leq \frac{1}{\hat{h}} \left\{ h(\theta_0) \|\nabla g(\hat{\theta})\| \left\{ \int \|\mathbf{u}\| |\pi^*(\mathbf{u}|\mathbf{R}) - \phi(\mathbf{I}(\theta_0)^{-1}, \mathbf{u})| d\mathbf{u} \right\} \right. \\
&\quad + h(\theta_0) c_1 \left\{ \int \|\mathbf{u}\| |\pi^*(\mathbf{u}|\mathbf{R}) - \phi(\mathbf{I}(\theta_0)^{-1}, \mathbf{u})| d\mathbf{u} \right\} \\
&\quad + \frac{1}{\sqrt{T}} \|\nabla h(\theta_0)\| \|\nabla g(\hat{\theta})\| \left( \int \|\mathbf{u}\|^2 |\pi^*(\mathbf{u}|\mathbf{R}) - \phi(\mathbf{I}(\theta_0)^{-1}, \mathbf{u})| d\mathbf{u} + \mathbf{I}(\theta_0)^{-1} \right) \\
&\quad + \frac{1}{\sqrt{T}} c_2 \|\nabla g(\hat{\theta})\| \left( \int \|\mathbf{u}\|^2 |\pi^*(\mathbf{u}|\mathbf{R}) - \phi(\mathbf{I}(\theta_0)^{-1}, \mathbf{u})| d\mathbf{u} + \mathbf{I}(\theta_0)^{-1} \right) \\
&\quad + \frac{1}{\sqrt{T}} \|\nabla h(\theta_0)\| c_1 \left( \int \|\mathbf{u}\|^2 |\pi^*(\mathbf{u}|\mathbf{R}) - \phi(\mathbf{I}(\theta_0)^{-1}, \mathbf{u})| d\mathbf{u} + \mathbf{I}(\theta_0)^{-1} \right) \\
&\quad + \frac{1}{\sqrt{T}} c_2 c_1 \left( \int \|\mathbf{u}\|^2 |\pi^*(\mathbf{u}|\mathbf{R}) - \phi(\mathbf{I}(\theta_0)^{-1}, \mathbf{u})| d\mathbf{u} + \mathbf{I}(\theta_0)^{-1} \right) \\
&\quad + \frac{1}{\sqrt{T}} \|\hat{\theta} - \theta_0\| \|\nabla h(\theta_0)\| \|\nabla g(\hat{\theta})\| \int \|\mathbf{u}\| |\pi^*(\mathbf{u}|\mathbf{R}) - \phi(\mathbf{I}(\theta_0)^{-1}, \mathbf{u})| d\mathbf{u} \\
&\quad + \frac{1}{\sqrt{T}} \|\hat{\theta} - \theta_0\| c_2 \|\nabla g(\hat{\theta})\| \int \|\mathbf{u}\| |\pi^*(\mathbf{u}|\mathbf{R}) - \phi(\mathbf{I}(\theta_0)^{-1}, \mathbf{u})| d\mathbf{u} \\
&\quad + \frac{1}{\sqrt{T}} \|\hat{\theta} - \theta_0\| \|\nabla h(\theta_0)\| c_1 \int \|\mathbf{u}\| |\pi^*(\mathbf{u}|\mathbf{R}) - \phi(\mathbf{I}(\theta_0)^{-1}, \mathbf{u})| d\mathbf{u} \\
&\quad \left. + \frac{1}{\sqrt{T}} \|\hat{\theta} - \theta_0\| c_2 c_1 \int \|\mathbf{u}\| |\pi^*(\mathbf{u}|\mathbf{R}) - \phi(\mathbf{I}(\theta_0)^{-1}, \mathbf{u})| d\mathbf{u} \right\},
\end{aligned}$$

taking into account that  $\hat{h} \xrightarrow{P} h(\theta_0) \neq 0$ ,  $\hat{\theta} \xrightarrow{P} \theta_0$ , assumptions **A**(4), **E**, **F** and result 2.2, then we conclude that  $\sqrt{T}(\hat{\omega}^* - g(\hat{\theta})) \xrightarrow{P} 0$  by Theorem 2.1.3 in [5].

□

## 2.4 Simulation exercises

### 2.4.1 Simulation details

Tables 2.1 and 2.2 show the mean vectors and covariance matrices of excess of returns for global minimum variance and tangency portfolios simulation exercises using 10 and 50 stocks, respectively.

**Table 2.1:** Mean and correlation matrix: 10 assets

| Expected Return | Correlation matrix |        |        |        |         |         |         |         |         |         |
|-----------------|--------------------|--------|--------|--------|---------|---------|---------|---------|---------|---------|
| -12,39%         | 1,0000             | 0,0931 | 0,1120 | 0,1306 | -0,0967 | 0,0982  | -0,0402 | -0,1942 | 0,0469  | -0,1207 |
| 16,43%          | -                  | 1,0000 | 0,0764 | 0,0523 | 0,0309  | -0,0450 | -0,0605 | -0,0065 | 0,1226  | 0,1290  |
| -10,89%         | -                  | -      | 1,0000 | 0,0022 | 0,0718  | 0,1121  | -0,0317 | 0,0096  | 0,0877  | -0,1039 |
| 13,00%          | -                  | -      | -      | 1,0000 | 0,0817  | 0,0479  | 0,1425  | -0,0614 | 0,1845  | -0,0765 |
| 16,62%          | -                  | -      | -      | -      | 1,0000  | 0,0641  | -0,1029 | 0,2510  | -0,0741 | 0,0039  |
| 0,21%           | -                  | -      | -      | -      | -       | 1,0000  | -0,0998 | -0,0420 | -0,0568 | -0,0917 |
| 3,76%           | -                  | -      | -      | -      | -       | -       | 1,0000  | 0,0461  | -0,0186 | 0,0285  |
| -9,34%          | -                  | -      | -      | -      | -       | -       | -       | 1,0000  | -0,0519 | -0,0361 |
| 1,73%           | -                  | -      | -      | -      | -       | -       | -       | -       | 1,0000  | -0,0069 |
| 18,75%          | -                  | -      | -      | -      | -       | -       | -       | -       | -       | 1,0000  |



parameters imply a non-informative prior distribution for  $\Sigma$ . This implies uncertainty regarding  $\Omega$ .<sup>3</sup>

**Table 2.3:**  $\alpha$ ,  $\beta$ , and  $H$ : 10 assets

| Alpha  | Betas   | Error variance |        |         |         |         |         |         |         |         |         |
|--------|---------|----------------|--------|---------|---------|---------|---------|---------|---------|---------|---------|
| -2,15% | 0,9028  | 3,8837         | 1,7186 | -2,2844 | -0,4246 | -3,9635 | -2,1763 | -1,6144 | -1,4926 | -0,9370 | -1,0180 |
| 8,66%  | -0,7351 | -              | 4,1537 | -0,7808 | -0,8591 | -1,6083 | 0,2882  | 0,3573  | -1,2962 | -0,5773 | -1,1712 |
| -1,58% | 0,2621  | -              | -      | 5,4638  | 1,2925  | 3,7016  | -0,4715 | -2,0064 | 2,7301  | -1,6119 | 1,3410  |
| 7,37%  | -1,2975 | -              | -      | -       | 5,8486  | 0,8501  | 0,1784  | 0,3940  | 1,9296  | -1,8786 | 1,3972  |
| 8,73%  | -0,8429 | -              | -      | -       | -       | 5,5818  | 1,7485  | 1,4281  | 2,7956  | 0,7115  | 0,4547  |
| 2,58%  | 0,5402  | -              | -      | -       | -       | -       | 7,1260  | 4,5114  | 2,7744  | 0,7845  | 0,6050  |
| 3,91%  | -1,3512 | -              | -      | -       | -       | -       | -       | 6,1486  | 0,1098  | 1,6010  | 0,2154  |
| -1,00% | 0,1004  | -              | -      | -       | -       | -       | -       | -       | 5,8499  | -0,5968 | 1,3032  |
| 3,15%  | -0,7126 | -              | -      | -       | -       | -       | -       | -       | -       | 2,1748  | -0,8852 |
| 9,53%  | 1,6904  | -              | -      | -       | -       | -       | -       | -       | -       | -       | 2,6829  |

<sup>3</sup> We only use informative priors for location parameters in tangency portfolio exercises. In addition, we only use informative priors for  $\alpha$  in Treynor–Black exercises.

Table 2.4:  $\alpha$ ,  $\beta$ , and  $H$ : 50 assets

| Asset | $\alpha$ | $\beta$ | $H$    |
|-------|----------|---------|--------|
| 1     | 0.0000   | 0.0000  | 0.0000 |
| 2     | 0.0000   | 0.0000  | 0.0000 |
| 3     | 0.0000   | 0.0000  | 0.0000 |
| 4     | 0.0000   | 0.0000  | 0.0000 |
| 5     | 0.0000   | 0.0000  | 0.0000 |
| 6     | 0.0000   | 0.0000  | 0.0000 |
| 7     | 0.0000   | 0.0000  | 0.0000 |
| 8     | 0.0000   | 0.0000  | 0.0000 |
| 9     | 0.0000   | 0.0000  | 0.0000 |
| 10    | 0.0000   | 0.0000  | 0.0000 |
| 11    | 0.0000   | 0.0000  | 0.0000 |
| 12    | 0.0000   | 0.0000  | 0.0000 |
| 13    | 0.0000   | 0.0000  | 0.0000 |
| 14    | 0.0000   | 0.0000  | 0.0000 |
| 15    | 0.0000   | 0.0000  | 0.0000 |
| 16    | 0.0000   | 0.0000  | 0.0000 |
| 17    | 0.0000   | 0.0000  | 0.0000 |
| 18    | 0.0000   | 0.0000  | 0.0000 |
| 19    | 0.0000   | 0.0000  | 0.0000 |
| 20    | 0.0000   | 0.0000  | 0.0000 |
| 21    | 0.0000   | 0.0000  | 0.0000 |
| 22    | 0.0000   | 0.0000  | 0.0000 |
| 23    | 0.0000   | 0.0000  | 0.0000 |
| 24    | 0.0000   | 0.0000  | 0.0000 |
| 25    | 0.0000   | 0.0000  | 0.0000 |
| 26    | 0.0000   | 0.0000  | 0.0000 |
| 27    | 0.0000   | 0.0000  | 0.0000 |
| 28    | 0.0000   | 0.0000  | 0.0000 |
| 29    | 0.0000   | 0.0000  | 0.0000 |
| 30    | 0.0000   | 0.0000  | 0.0000 |
| 31    | 0.0000   | 0.0000  | 0.0000 |
| 32    | 0.0000   | 0.0000  | 0.0000 |
| 33    | 0.0000   | 0.0000  | 0.0000 |
| 34    | 0.0000   | 0.0000  | 0.0000 |
| 35    | 0.0000   | 0.0000  | 0.0000 |
| 36    | 0.0000   | 0.0000  | 0.0000 |
| 37    | 0.0000   | 0.0000  | 0.0000 |
| 38    | 0.0000   | 0.0000  | 0.0000 |
| 39    | 0.0000   | 0.0000  | 0.0000 |
| 40    | 0.0000   | 0.0000  | 0.0000 |
| 41    | 0.0000   | 0.0000  | 0.0000 |
| 42    | 0.0000   | 0.0000  | 0.0000 |
| 43    | 0.0000   | 0.0000  | 0.0000 |
| 44    | 0.0000   | 0.0000  | 0.0000 |
| 45    | 0.0000   | 0.0000  | 0.0000 |
| 46    | 0.0000   | 0.0000  | 0.0000 |
| 47    | 0.0000   | 0.0000  | 0.0000 |
| 48    | 0.0000   | 0.0000  | 0.0000 |
| 49    | 0.0000   | 0.0000  | 0.0000 |
| 50    | 0.0000   | 0.0000  | 0.0000 |

Tables 2.5 and 2.6 show optimal population weights given previous setting.



**Table 2.5:** Optimal population weights for tangency, global minimum variance, and Treynor-Black portfolios: 10 assets

| Weights |        |         |
|---------|--------|---------|
| TP      | GMV    | TB      |
| -48,02% | 12,11% | 32,58%  |
| 54,99%  | 6,72%  | 5,56%   |
| -36,51% | 7,63%  | -4,15%  |
| 41,20%  | 5,63%  | 8,12%   |
| 65,24%  | 8,74%  | 29,49%  |
| 9,84%   | 11,57% | 14,25%  |
| 16,21%  | 12,24% | -17,20% |
| -53,54% | 12,00% | -14,45% |
| 0,41%   | 9,76%  | 23,31%  |
| 50,17%  | 13,61% | 22,49%  |

TP: Tangency portfolio, GMV: Global minimum variance, and TB: Treynor-Black

**Table 2.6:** Optimal population weights for tangency, global minimum variance, and Treynor-Black portfolios: 50 assets

| TP      | MGV    | TB      |
|---------|--------|---------|
| -15,91% | 2,07%  | 31,77%  |
| 34,93%  | 3,91%  | -0,58%  |
| 2,70%   | 2,02%  | 9,24%   |
| 10,05%  | 1,95%  | 6,57%   |
| 13,45%  | 1,52%  | -0,05%  |
| 7,72%   | 4,46%  | 7,36%   |
| -2,29%  | 1,13%  | 8,97%   |
| -1,76%  | 5,84%  | 3,35%   |
| 1,31%   | 0,77%  | -0,09%  |
| 21,79%  | 3,43%  | 2,80%   |
| 22,85%  | 0,59%  | 8,96%   |
| 1,71%   | -1,06% | 1,70%   |
| -4,79%  | 0,22%  | 25,16%  |
| -31,67% | 2,88%  | -11,61% |
| 4,76%   | 5,12%  | 25,81%  |
| 8,98%   | 3,95%  | -10,13% |
| 1,19%   | 1,48%  | 33,44%  |
| -5,71%  | 2,73%  | -1,01%  |
| 27,90%  | 2,50%  | -23,76% |
| 1,16%   | 2,15%  | 2,88%   |
| 21,58%  | 1,28%  | -2,18%  |
| -28,95% | 1,18%  | 9,18%   |
| -9,84%  | -1,87% | -6,27%  |
| -27,98% | 3,22%  | 13,68%  |
| 16,28%  | 2,13%  | 8,10%   |
| -1,34%  | 3,65%  | 18,29%  |
| -2,50%  | 1,20%  | 7,44%   |
| 0,59%   | 1,77%  | -28,79% |
| -8,26%  | 0,66%  | -12,95% |
| -1,32%  | 4,09%  | -3,05%  |
| -6,38%  | 2,72%  | 0,22%   |
| -20,59% | -0,02% | -10,91% |
| 4,50%   | 3,38%  | -7,49%  |
| -6,28%  | 4,91%  | -21,41% |
| -27,90% | -0,65% | 0,76%   |
| 13,55%  | 3,11%  | 5,30%   |
| 7,78%   | 2,09%  | -4,07%  |
| 17,94%  | 1,04%  | 16,65%  |
| 42,64%  | 3,34%  | 13,19%  |
| -31,53% | 1,09%  | -20,80% |
| 7,17%   | 2,61%  | -8,57%  |
| -4,28%  | 2,64%  | 8,75%   |
| 26,14%  | 1,67%  | -9,71%  |
| -21,12% | 0,64%  | -17,58% |
| -15,29% | 2,03%  | 4,91%   |
| 37,61%  | 1,07%  | 43,31%  |
| 3,75%   | 0,97%  | -12,75% |
| -0,90%  | 0,32%  | 1,49%   |
| -7,94%  | 0,35%  | -3,92%  |
| 24,51%  | 1,73%  | -1,58%  |

TP: Tangency portfolio, GMV: Global minimum variance, and TB: Treynor-Black

Table 2.7 the optimal values of the different objective functions.

**Table 2.7:** Objective Values

| portfolio<br>Size | Sharpe<br>Ratio | Variance | Inf. Ratio |
|-------------------|-----------------|----------|------------|
| 10                | 0,3793          | 0,1060   | 0,3214     |
| 50                | 1,2081          | 0.0150   | 1,9090     |

#### 2.4.2 Robustness Check

The previous simulation exercises assume that returns are serially independent and normal distributed. However, these assumption may be not satisfied in practice. Therefore, we conduct some simulation exercises to check robustness of our results.

We set population parameters as in the main framework but stochastic errors are drawn from a multivariate *Student's t*-distribution with 4 degrees of freedom or *AR*(1) process.

Table 2.8 and Table 2.9 show the summary statistics for the squared errors of global minimum variance portfolio weights when the data is generated from a multivariate *Student's t*-distribution and *AR*(1) process, respectively. We can observe that there are not significant differences. We got similar results in the main setting. As a consequence of these results, we do not observe any substantial difference in variance estimates (Tables 2.10 and 2.11).

Table 2.12 and Table 2.13 show summary statistics of squared errors for tangency portfolio using a multivariate *Student's-t* or *AR*(1) process to generate the data. We observe that our MELO proposal have the lowest degree of variability as well as MSE. Tables 2.14 and 2.15 show the descriptive statistics of Sharpe ratios. Informative approaches dominate estimation performance. Finally, the Treynor–Black model present similar results as the initial simulation. Informative MELO shows the lowest MSE and plug-in the highest MSE in all cases (Tables 2.16 and 2.17). Regarding information ratio, there is no significant difference between any of the methodologies, although the informative cases present a little improvement (Tables 2.18 and 2.19). In summary, the good results of our MELO proposal that are presented in the main framework are robust to heavy tails and serial dependence.

**Table 2.8:** Weights: Global minimum variance using Student's-t

| Stocks = 10     |             |        |        |        |        |        |        |
|-----------------|-------------|--------|--------|--------|--------|--------|--------|
| Method          | Sample size | Min    | 1st Q  | Median | Mean   | 3rd Q  | Max    |
| Plug-in         |             | 0.0014 | 0.0110 | 0.0164 | 0.0191 | 0.0243 | 0.0727 |
| Bayesian NI     |             | 0.0014 | 0.0110 | 0.0164 | 0.0191 | 0.0243 | 0.0727 |
| Bayesian I      | 120         | 0.0015 | 0.0106 | 0.0159 | 0.0187 | 0.0239 | 0.0716 |
| MELO NI         |             | 0.0016 | 0.0111 | 0.0164 | 0.0192 | 0.0243 | 0.0731 |
| MELO I          |             | 0.0011 | 0.0105 | 0.0161 | 0.0184 | 0.0236 | 0.0736 |
| Naive ( $1/N$ ) |             | 0.0066 | 0.0066 | 0.0066 | 0.0066 | 0.0066 | 0.0066 |
| Plug-in         |             | 0.0006 | 0.0060 | 0.0088 | 0.0101 | 0.0125 | 0.0668 |
| Bayesian NI     |             | 0.0006 | 0.0060 | 0.0088 | 0.0101 | 0.0125 | 0.0668 |
| Bayesian I      | 240         | 0.0007 | 0.0060 | 0.0087 | 0.0100 | 0.0124 | 0.0665 |
| MELO NI         |             | 0.0006 | 0.0061 | 0.0087 | 0.0102 | 0.0125 | 0.0656 |
| MELO I          |             | 0.0011 | 0.0063 | 0.0089 | 0.0103 | 0.0128 | 0.0620 |
| Naive ( $1/N$ ) |             | 0.0023 | 0.0023 | 0.0023 | 0.0023 | 0.0023 | 0.0023 |
| Stocks = 50     |             |        |        |        |        |        |        |
| Plug-in         |             | 0.0084 | 0.0182 | 0.0223 | 0.0234 | 0.0276 | 0.0553 |
| Bayesian NI     |             | 0.0084 | 0.0182 | 0.0223 | 0.0234 | 0.0276 | 0.0553 |
| Bayesian I      | 120         | 0.0080 | 0.0170 | 0.0208 | 0.0219 | 0.0259 | 0.0526 |
| MELO NI         |             | 0.0089 | 0.0184 | 0.0224 | 0.0235 | 0.0278 | 0.0560 |
| MELO I          |             | 0.0075 | 0.0178 | 0.0215 | 0.0225 | 0.0263 | 0.0528 |
| Naive ( $1/N$ ) |             | 0.0123 | 0.0123 | 0.0123 | 0.0123 | 0.0123 | 0.0123 |
| Plug-in         |             | 0.0033 | 0.0068 | 0.0081 | 0.0083 | 0.0095 | 0.0219 |
| Bayesian NI     |             | 0.0033 | 0.0068 | 0.0081 | 0.0083 | 0.0095 | 0.0219 |
| Bayesian I      | 240         | 0.0032 | 0.0067 | 0.0079 | 0.0082 | 0.0094 | 0.0214 |
| MELO NI         |             | 0.0035 | 0.0069 | 0.0081 | 0.0084 | 0.0096 | 0.0224 |
| MELO I          |             | 0.0037 | 0.0071 | 0.0084 | 0.0087 | 0.0099 | 0.0208 |
| Naive ( $1/N$ ) |             | 0.0056 | 0.0056 | 0.0056 | 0.0056 | 0.0056 | 0.0056 |

Note: This table shows summary statistics for the squared error.  
 "NI": Non-informative priors. "I": Informative priors. Stochastic errors  
 are drawn from a multivariate student's-t distribution with 4 degrees of freedom.

**Table 2.9:** Weights: Global minimum variance using AR(1)

| Stocks = 10 |             |        |        |        |        |        |        |
|-------------|-------------|--------|--------|--------|--------|--------|--------|
| Method      | Sample size | Min    | 1st Q  | Median | Mean   | 3rd Q  | Max    |
| Plug-in     |             | 0.0010 | 0.0072 | 0.0102 | 0.0109 | 0.0137 | 0.0337 |
| Bayesian NI |             | 0.0010 | 0.0072 | 0.0102 | 0.0109 | 0.0137 | 0.0337 |
| Bayesian I  | 120         | 0.0013 | 0.0072 | 0.0101 | 0.0108 | 0.0135 | 0.0329 |
| MELO NI     |             | 0.0008 | 0.0074 | 0.0103 | 0.0110 | 0.0138 | 0.0325 |
| MELO I      |             | 0.0009 | 0.0076 | 0.0106 | 0.0112 | 0.0139 | 0.0308 |
| Naive (1/N) |             | 0.0066 | 0.0066 | 0.0066 | 0.0066 | 0.0066 | 0.0066 |
| Plug-in     |             | 0.0017 | 0.0069 | 0.0091 | 0.0095 | 0.0118 | 0.0249 |
| Bayesian NI |             | 0.0017 | 0.0069 | 0.0091 | 0.0095 | 0.0118 | 0.0249 |
| Bayesian I  | 240         | 0.0017 | 0.0070 | 0.0092 | 0.0096 | 0.0118 | 0.0254 |
| MELO NI     |             | 0.0017 | 0.0069 | 0.0092 | 0.0095 | 0.0119 | 0.0243 |
| MELO I      |             | 0.0024 | 0.0076 | 0.0099 | 0.0103 | 0.0125 | 0.0260 |
| Naive (1/N) |             | 0.0023 | 0.0023 | 0.0023 | 0.0023 | 0.0023 | 0.0023 |
| Stocks = 50 |             |        |        |        |        |        |        |
| Plug-in     |             | 0.0066 | 0.0160 | 0.0195 | 0.0202 | 0.0238 | 0.0419 |
| Bayesian NI |             | 0.0066 | 0.0160 | 0.0195 | 0.0202 | 0.0238 | 0.0419 |
| Bayesian I  | 120         | 0.0064 | 0.0154 | 0.0187 | 0.0194 | 0.0227 | 0.0416 |
| MELO NI     |             | 0.0066 | 0.0161 | 0.0196 | 0.0203 | 0.0238 | 0.0414 |
| MELO I      |             | 0.0068 | 0.0158 | 0.0191 | 0.0197 | 0.0230 | 0.0436 |
| Naive (1/N) |             | 0.0123 | 0.0123 | 0.0123 | 0.0123 | 0.0123 | 0.0123 |
| Plug-in     |             | 0.0038 | 0.0066 | 0.0078 | 0.0079 | 0.0089 | 0.0154 |
| Bayesian NI |             | 0.0038 | 0.0066 | 0.0078 | 0.0079 | 0.0089 | 0.0154 |
| Bayesian I  | 240         | 0.0038 | 0.0065 | 0.0077 | 0.0078 | 0.0088 | 0.0151 |
| MELO NI     |             | 0.0038 | 0.0066 | 0.0078 | 0.0079 | 0.009  | 0.0152 |
| MELO I      |             | 0.0039 | 0.007  | 0.0082 | 0.0083 | 0.0094 | 0.0155 |
| Naive (1/N) |             | 0.0056 | 0.0056 | 0.0056 | 0.0056 | 0.0056 | 0.0056 |

Note: This table shows summary statistics for the squared error.

“NI”: Non-informative priors. “I”: Informative priors.

Stochastic errors are drawn from a AR(1) process.

**Table 2.10:** Variance: Global minimum variance using Student's-t

| Stocks = 10; sigma_120= 0.325723; sigma_120=0.3212232 |             |        |        |        |        |        |        |
|-------------------------------------------------------|-------------|--------|--------|--------|--------|--------|--------|
| Method                                                | Sample size | Min    | 1st Q  | Median | Mean   | 3rd Q  | Max    |
| Plug-in                                               |             | 0.3280 | 0.3410 | 0.3484 | 0.3513 | 0.3579 | 0.4125 |
| Bayesian NI                                           |             | 0.3280 | 0.3410 | 0.3484 | 0.3513 | 0.3579 | 0.4125 |
| Bayesian I                                            | 120         | 0.3284 | 0.3406 | 0.3478 | 0.3507 | 0.3574 | 0.4091 |
| MELO NI                                               |             | 0.3280 | 0.3410 | 0.3484 | 0.3514 | 0.3581 | 0.4166 |
| MELO I                                                |             | 0.3276 | 0.3404 | 0.3475 | 0.3505 | 0.3571 | 0.4131 |
| Naive (1/N)                                           |             | 0.3349 | 0.3349 | 0.3349 | 0.3349 | 0.3349 | 0.3349 |
| Plug-in                                               |             | 0.3223 | 0.3301 | 0.3341 | 0.3360 | 0.3395 | 0.4060 |
| Bayesian NI                                           |             | 0.3223 | 0.3301 | 0.3341 | 0.3360 | 0.3395 | 0.4060 |
| Bayesian I                                            | 240         | 0.3224 | 0.3300 | 0.3340 | 0.3359 | 0.3393 | 0.4053 |
| MELO NI                                               |             | 0.3223 | 0.3302 | 0.3343 | 0.3361 | 0.3396 | 0.4046 |
| MELO I                                                |             | 0.3230 | 0.3305 | 0.3344 | 0.3363 | 0.3400 | 0.4005 |
| Naive (1/N)                                           |             | 0.3247 | 0.3247 | 0.3247 | 0.3247 | 0.3247 | 0.3247 |
| Stocks = 50; sigma_120=0.122543 ; sigma_240=0.1253086 |             |        |        |        |        |        |        |
| Method                                                | Sample size | Min    | 1st Q  | Median | Mean   | 3rd Q  | Max    |
| Plug-in                                               |             | 0.1450 | 0.1641 | 0.1713 | 0.1724 | 0.1796 | 0.2145 |
| Bayesian NI                                           |             | 0.1450 | 0.1641 | 0.1713 | 0.1724 | 0.1796 | 0.2145 |
| Bayesian I                                            | 120         | 0.1432 | 0.1619 | 0.1685 | 0.1695 | 0.1765 | 0.2086 |
| MELO NI                                               |             | 0.1455 | 0.1643 | 0.1715 | 0.1726 | 0.1798 | 0.2141 |
| MELO I                                                |             | 0.1433 | 0.1628 | 0.1694 | 0.1704 | 0.1770 | 0.2130 |
| Naive (1/N)                                           |             | 0.1509 | 0.1509 | 0.1509 | 0.1509 | 0.1509 | 0.1509 |
| Plug-in                                               |             | 0.1379 | 0.1462 | 0.1494 | 0.1500 | 0.1535 | 0.1756 |
| Bayesian NI                                           |             | 0.1379 | 0.1462 | 0.1494 | 0.1500 | 0.1535 | 0.1756 |
| Bayesian I                                            | 240         | 0.1376 | 0.1457 | 0.1490 | 0.1496 | 0.1530 | 0.1744 |
| MELO NI                                               |             | 0.1378 | 0.1464 | 0.1494 | 0.1501 | 0.1536 | 0.1761 |
| MELO I                                                |             | 0.1379 | 0.1468 | 0.1503 | 0.1508 | 0.1543 | 0.1755 |
| Naive (1/N)                                           |             | 0.1422 | 0.1422 | 0.1422 | 0.1422 | 0.1422 | 0.1422 |

Note: This table shows summary statistics for the squared error.  
 "NI": Non-informative priors. "I": Informative priors. Stochastic errors  
 are drawn from a multivariate student's-t distribution with 4 degrees of freedom.

**Table 2.11:** Variance: Global minimum variance using AR(1)

| Stocks = 10; sigma_120= 0.325723; sigma_120=0.3212232 |             |        |        |        |        |        |        |
|-------------------------------------------------------|-------------|--------|--------|--------|--------|--------|--------|
| Method                                                | Sample size | Min    | 1st Q  | Median | Mean   | 3rd Q  | Max    |
| Plug-in                                               |             | 0.3272 | 0.3360 | 0.3399 | 0.3409 | 0.3446 | 0.3748 |
| Bayesian NI                                           |             | 0.3272 | 0.3360 | 0.3399 | 0.3409 | 0.3446 | 0.3748 |
| Bayesian I                                            | 120         | 0.3275 | 0.3359 | 0.3400 | 0.3407 | 0.3445 | 0.3737 |
| MELO NI                                               |             | 0.3272 | 0.3361 | 0.3401 | 0.3410 | 0.3447 | 0.3732 |
| MELO I                                                |             | 0.3271 | 0.3362 | 0.3404 | 0.3412 | 0.3452 | 0.3688 |
| Naive (1/N)                                           |             | 0.3349 | 0.3349 | 0.3349 | 0.3349 | 0.3349 | 0.3349 |
| Plug-in                                               |             | 0.3240 | 0.3312 | 0.3343 | 0.3348 | 0.3381 | 0.3545 |
| Bayesian NI                                           |             | 0.3240 | 0.3312 | 0.3343 | 0.3348 | 0.3381 | 0.3545 |
| Bayesian I                                            | 240         | 0.3240 | 0.3313 | 0.3344 | 0.3349 | 0.3381 | 0.3546 |
| MELO NI                                               |             | 0.3240 | 0.3312 | 0.3343 | 0.3349 | 0.3381 | 0.3537 |
| MELO I                                                |             | 0.3249 | 0.3322 | 0.3355 | 0.3359 | 0.3391 | 0.3560 |
| Naive (1/N)                                           |             | 0.3247 | 0.3247 | 0.3247 | 0.3247 | 0.3247 | 0.3247 |
| Stocks = 50; sigma_120=0.122543 ; sigma_240=0.1253086 |             |        |        |        |        |        |        |
| Method                                                | Sample size | Min    | 1st Q  | Median | Mean   | 3rd Q  | Max    |
| Plug-in                                               |             | 0.1420 | 0.1606 | 0.1664 | 0.1672 | 0.1730 | 0.2037 |
| Bayesian NI                                           |             | 0.1420 | 0.1606 | 0.1664 | 0.1672 | 0.1730 | 0.2037 |
| Bayesian I                                            | 120         | 0.1400 | 0.1591 | 0.1648 | 0.1655 | 0.1711 | 0.2038 |
| MELO NI                                               |             | 0.1421 | 0.1608 | 0.1666 | 0.1674 | 0.1733 | 0.2036 |
| MELO I                                                |             | 0.1441 | 0.1597 | 0.1658 | 0.1665 | 0.1719 | 0.2102 |
| Naive (1/N)                                           |             | 0.1509 | 0.1509 | 0.1509 | 0.1509 | 0.1509 | 0.1509 |
| Plug-in                                               |             | 0.1381 | 0.1459 | 0.1491 | 0.1493 | 0.1522 | 0.1661 |
| Bayesian NI                                           |             | 0.1381 | 0.1459 | 0.1491 | 0.1493 | 0.1522 | 0.1661 |
| Bayesian I                                            | 240         | 0.1374 | 0.1458 | 0.1489 | 0.1490 | 0.1519 | 0.1657 |
| MELO NI                                               |             | 0.1380 | 0.1462 | 0.1491 | 0.1494 | 0.1523 | 0.1661 |
| MELO I                                                |             | 0.1374 | 0.1467 | 0.1495 | 0.1499 | 0.1528 | 0.1667 |
| Naive (1/N)                                           |             | 0.1422 | 0.1422 | 0.1422 | 0.1422 | 0.1422 | 0.1422 |

Note: This table shows summary statistics for the squared error.

“NI”: Non-informative priors. “I”: Informative priors.

Stochastic errors are drawn from a AR(1) process.

**Table 2.12:** Weights: Tangency portfolio using Student's-t

| Stocks = 10 |             |        |        |        |             |             |                 |                 |
|-------------|-------------|--------|--------|--------|-------------|-------------|-----------------|-----------------|
| Method      | Sample size | Min    | 1st Q  | Median | Mean        | 3rd Q       | Max             |                 |
| Plug-in     |             | 0.0520 | 0.7813 | 1.2893 | 5,259.6005  | 7.6138      | 3,602,104.8449  |                 |
| Shrinkage   |             | 0.0856 | 0.8145 | 1.2034 | 2,526.7271  | 4.2920      | 1,618,338.6448  |                 |
| Bayesian NI | 120         | 0.0520 | 0.7813 | 1.2893 | 5,259.6005  | 7.6138      | 3,602,104.8449  |                 |
| Bayesian I  |             | 0.0294 | 0.3862 | 0.5967 | 6,605.7032  | 1.8151      | 5,975,170.4390  |                 |
| MELO NI     |             | 0.1323 | 0.7493 | 0.9746 | 1.3971      | 1.3981      | 7.5181          |                 |
| MELO I      |             | 0.0409 | 0.3281 | 0.4665 | 0.8212      | 0.6648      | 11.9204         |                 |
| Naive (1/N) |             | 1.7360 | 1.7360 | 1.7360 | 1.7360      | 1.7360      | 1.7360          |                 |
| Plug-in     |             |        | 0.0457 | 0.3059 | 0.4915      | 124.2089    | 1.4563          | 50,923.1849     |
| Shrinkage   |             |        | 0.0657 | 0.3178 | 0.4681      | 82.5681     | 0.8574          | 35,360.7469     |
| Bayesian NI | 240         | 0.0457 | 0.3059 | 0.4915 | 124.2089    | 1.4563      | 50,923.1849     |                 |
| Bayesian I  |             | 0.0155 | 0.1379 | 0.2122 | 10.6512     | 0.4132      | 7,682.8385      |                 |
| MELO NI     |             | 0.0646 | 0.2640 | 0.3560 | 0.5252      | 0.5027      | 6.3474          |                 |
| MELO I      |             | 0.0212 | 0.1322 | 0.2008 | 0.3483      | 0.3201      | 14.0347         |                 |
| Naive (1/N) |             | 1.1570 | 1.1570 | 1.1570 | 1.1570      | 1.1570      | 1.1570          |                 |
| Plug-in     |             |        | 0.2911 | 0.7799 | 1.2011      | 14,808.0309 | 7.9732          | 14,571,788.8158 |
| Shrinkage   |             |        | 0.2924 | 0.7625 | 0.9772      | 11,432.4759 | 4.4684          | 11,297,502.1113 |
| Bayesian NI | 120         | 0.2911 | 0.7799 | 1.2011 | 14,808.0309 | 7.9732      | 14,571,788.8155 |                 |
| Bayesian I  |             | 0.2544 | 0.6139 | 0.8567 | 6,145.2737  | 4.5235      | 4,961,375.0658  |                 |
| MELO NI     |             | 0.2818 | 0.6739 | 0.8205 | 1.3409      | 1.0479      | 7.9691          |                 |
| MELO I      |             | 0.4558 | 0.7586 | 0.8497 | 1.0169      | 0.9972      | 3.6699          |                 |
| Naive (1/N) |             | 1.5310 | 1.5310 | 1.5310 | 1.5310      | 1.5310      | 1.5310          |                 |
| Plug-in     |             |        | 0.1536 | 0.2772 | 0.3685      | 1,302.9453  | 1.1773          | 824,784.4664    |
| Shrinkage   |             |        | 0.1429 | 0.2667 | 0.3261      | 752.5638    | 0.7324          | 438,595.0858    |
| Bayesian NI | 240         | 0.1536 | 0.2772 | 0.3685 | 1,302.9453  | 1.1773      | 824,784.4664    |                 |
| Bayesian I  |             | 0.1056 | 0.2048 | 0.2695 | 323.4630    | 0.6132      | 286,826.2194    |                 |
| MELO NI     |             | 0.1317 | 0.2519 | 0.2971 | 0.4361      | 0.3650      | 4.7133          |                 |
| MELO I      |             | 0.1076 | 0.1877 | 0.2179 | 0.2649      | 0.2547      | 2.9808          |                 |
| Naive (1/N) |             | 0.7058 | 0.7058 | 0.7058 | 0.7058      | 0.7058      | 0.7058          |                 |

Note: This table shows summary statistics for the squared error.

“NI”: Non-informative priors. “I”: Informative priors. Stochastic errors are drawn from a multivariate student's-t distribution with 4 degrees of freedom.

**Table 2.13:** Weights: Tangency portfolio using AR(1)

| Stocks = 10 |             |        |        |        |                |         |                    |
|-------------|-------------|--------|--------|--------|----------------|---------|--------------------|
| Method      | Sample size | Min    | 1st Q  | Median | Mean           | 3rd Q   | Max                |
| Plug-in     |             | 0.2443 | 1.0457 | 2.2594 | 2,111.7934     | 11.3143 | 1,463,010.2553     |
| Shrinkage   |             | 0.2689 | 1.0409 | 1.7287 | 1,066.0852     | 8.5640  | 645,298.1837       |
| Bayesian NI |             | 0.2443 | 1.0457 | 2.2594 | 2,111.7934     | 11.3143 | 1,463,010.2553     |
| Bayesian I  | 120         | 0.0644 | 0.4017 | 0.6626 | 1,640.8696     | 3.0662  | 455,446.3691       |
| MELO NI     |             | 0.2085 | 0.9281 | 1.2291 | 1.6885         | 2.0192  | 6.4059             |
| MELO I      |             | 0.0365 | 0.3386 | 0.4869 | 0.9640         | 0.6665  | 11.0816            |
| Naive (1/N) |             | 1.7360 | 1.7360 | 1.7360 | 1.7360         | 1.7360  | 1.7360             |
| Plug-in     |             | 0.0494 | 0.4354 | 1.0767 | 1,845,443.8977 | 9.6919  | 1,843,392,342.3385 |
| Shrinkage   |             | 0.0638 | 0.4165 | 0.8586 | 1,760,248.3245 | 7.2455  | 1,758,350,678.9414 |
| Bayesian NI |             | 0.0494 | 0.4354 | 1.0767 | 1,845,443.8978 | 9.6919  | 1,843,392,342.4105 |
| Bayesian I  | 240         | 0.0311 | 0.1646 | 0.3364 | 3,562.5269     | 1.3584  | 2,940,030.6373     |
| MELO NI     |             | 0.0676 | 0.3278 | 0.4984 | 0.9248         | 0.8190  | 6.2356             |
| MELO I      |             | 0.0229 | 0.1442 | 0.2549 | 0.5990         | 0.6372  | 15.0396            |
| Naive (1/N) |             | 1.1570 | 1.1570 | 1.1570 | 1.1570         | 1.1570  | 1.1570             |
| Stocks = 50 |             |        |        |        |                |         |                    |
| Plug-in     |             | 0.5020 | 0.9803 | 1.3303 | 747.0103       | 5.6053  | 216,372.6336       |
| Shrinkage   |             | 0.4953 | 0.9592 | 1.2008 | 513.7773       | 4.3128  | 161,295.0070       |
| Bayesian NI |             | 0.5020 | 0.9803 | 1.3303 | 747.0103       | 5.6053  | 216,372.6336       |
| Bayesian I  | 120         | 0.3408 | 0.6307 | 0.7530 | 129.3772       | 1.0373  | 55,913.0072        |
| MELO NI     |             | 0.4081 | 0.8791 | 1.0139 | 1.2973         | 1.2336  | 6.5596             |
| MELO I      |             | 0.4523 | 0.7012 | 0.7841 | 0.8544         | 0.8835  | 3.3046             |
| Naive (1/N) |             | 1.5310 | 1.5310 | 1.5310 | 1.5310         | 1.5310  | 1.5310             |
| Plug-in     |             | 0.165  | 0.3372 | 0.4488 | 69.5874        | 1.0824  | 27,495.787         |
| Shrinkage   |             | 0.1603 | 0.3319 | 0.4127 | 53.6413        | 0.8294  | 20,424.9287        |
| Bayesian NI |             | 0.165  | 0.3372 | 0.4488 | 69.5874        | 1.0824  | 27,495.787         |
| Bayesian I  | 240         | 0.091  | 0.1796 | 0.2143 | 67.8975        | 0.2864  | 56,790.8303        |
| MELO NI     |             | 0.1559 | 0.3084 | 0.3645 | 0.4529         | 0.4384  | 3.6619             |
| MELO I      |             | 0.0995 | 0.1764 | 0.2037 | 0.2126         | 0.2329  | 1.5794             |
| Naive (1/N) |             | 0.7058 | 0.7058 | 0.7058 | 0.7058         | 0.7058  | 0.7058             |

Note: This table shows summary statistics for the squared error.

“NI”: Non-informative priors. “I”: Informative priors.

Stochastic errors are drawn from a AR(1) process.



**Table 2.14:** Sharpe ratio: Tangency portfolio using Student's-t

| Stocks= 10; SR_120=0.379298; SR_240=0.3866669 |             |         |        |        |        |        |        |
|-----------------------------------------------|-------------|---------|--------|--------|--------|--------|--------|
| Method                                        | Sample size | Min     | 1st Q  | Median | Mean   | 3rd Q  | Max    |
| Plug-in                                       |             | -0.3475 | 0.2364 | 0.2877 | 0.1948 | 0.3152 | 0.3728 |
| Shrinkage                                     |             | -0.3469 | 0.2145 | 0.2802 | 0.1883 | 0.3120 | 0.3702 |
| Bayesian NI                                   |             | -0.3475 | 0.2364 | 0.2877 | 0.1948 | 0.3152 | 0.3728 |
| Bayesian I                                    | 120         | -0.3589 | 0.3281 | 0.3433 | 0.3055 | 0.3540 | 0.3766 |
| MELO NI                                       |             | -0.2938 | 0.2126 | 0.2804 | 0.2031 | 0.3106 | 0.3706 |
| MELO I                                        |             | -0.3395 | 0.3263 | 0.3431 | 0.3081 | 0.3544 | 0.3772 |
| Naive (1/N)                                   |             | 0.1131  | 0.1131 | 0.1131 | 0.1131 | 0.1131 | 0.1131 |
| Plug-in                                       |             | -0.3508 | 0.3143 | 0.3355 | 0.3006 | 0.3496 | 0.3799 |
| Shrinkage                                     |             | -0.3491 | 0.3116 | 0.3340 | 0.2988 | 0.3482 | 0.3802 |
| Bayesian NI                                   |             | -0.3508 | 0.3143 | 0.3355 | 0.3006 | 0.3496 | 0.3799 |
| Bayesian I                                    | 240         | -0.3436 | 0.3573 | 0.3654 | 0.3617 | 0.3717 | 0.3844 |
| MELO NI                                       |             | -0.3212 | 0.3116 | 0.3350 | 0.3019 | 0.3497 | 0.3787 |
| MELO I                                        |             | -0.3336 | 0.3578 | 0.3655 | 0.3620 | 0.3718 | 0.3839 |
| Naive (1/N)                                   |             | 0.1167  | 0.1167 | 0.1167 | 0.1167 | 0.1167 | 0.1167 |
| Stocks= 50; SR_120=1.20819; SR_240=0.9470014  |             |         |        |        |        |        |        |
| Method                                        | Sample size | Min     | 1st Q  | Median | Mean   | 3rd Q  | Max    |
| Plug-in                                       |             | -0.9154 | 0.6681 | 0.7485 | 0.5177 | 0.8073 | 1.0179 |
| Shrinkage                                     |             | -0.9060 | 0.6599 | 0.7409 | 0.5116 | 0.8024 | 1.0129 |
| Bayesian NI                                   |             | -0.9154 | 0.6681 | 0.7485 | 0.5177 | 0.8073 | 1.0179 |
| Bayesian I                                    | 120         | -0.9783 | 0.7923 | 0.8431 | 0.6777 | 0.8868 | 1.0324 |
| MELO NI                                       |             | -0.8946 | 0.6496 | 0.7384 | 0.5210 | 0.7984 | 1.0226 |
| MELO I                                        |             | -0.8273 | 0.6926 | 0.7820 | 0.6271 | 0.8318 | 0.9754 |
| Naive (1/N)                                   |             | 0.1188  | 0.1188 | 0.1188 | 0.1188 | 0.1188 | 0.1188 |
| Plug-in                                       |             | -0.8150 | 0.7013 | 0.7294 | 0.6560 | 0.7592 | 0.8420 |
| Shrinkage                                     |             | -0.8146 | 0.7000 | 0.7279 | 0.6550 | 0.7590 | 0.8440 |
| Bayesian NI                                   |             | -0.8150 | 0.7013 | 0.7294 | 0.6560 | 0.7592 | 0.8420 |
| Bayesian I                                    | 240         | -0.8589 | 0.7648 | 0.7881 | 0.7409 | 0.8079 | 0.8788 |
| MELO NI                                       |             | -0.7553 | 0.6990 | 0.7286 | 0.6550 | 0.7583 | 0.8523 |
| MELO I                                        |             | -0.8036 | 0.7572 | 0.7815 | 0.7372 | 0.8035 | 0.8718 |
| Naive (1/N)                                   |             | 0.1260  | 0.1260 | 0.1260 | 0.1260 | 0.1260 | 0.1260 |

Note: This table shows summary statistics for the squared error.

“NI”: Non-informative priors. “I”: Informative priors. Stochastic errors are drawn from a multivariate student's-t distribution with 4 degrees of freedom.

**Table 2.15:** Sharpe ratio: Tangency portfolio using AR(1)

| Stocks= 10; SR_120=0.379298; SR_240=0.3866669 |             |         |         |        |        |        |        |
|-----------------------------------------------|-------------|---------|---------|--------|--------|--------|--------|
| Method                                        | Sample size | Min     | 1st Q   | Median | Mean   | 3rd Q  | Max    |
| Plug-in                                       |             | -0.3396 | -0.0526 | 0.2452 | 0.1370 | 0.2954 | 0.3595 |
| Shrinkage                                     |             | -0.3393 | -0.0517 | 0.2441 | 0.1370 | 0.2932 | 0.3567 |
| Bayesian NI                                   |             | -0.3396 | -0.0526 | 0.2452 | 0.1370 | 0.2954 | 0.3595 |
| Bayesian I                                    | 120         | -0.3562 | 0.3253  | 0.3413 | 0.2865 | 0.3528 | 0.3750 |
| MELO NI                                       |             | -0.2910 | 0.0547  | 0.2358 | 0.1528 | 0.2866 | 0.3613 |
| MELO I                                        |             | -0.3330 | 0.3236  | 0.3414 | 0.2911 | 0.3531 | 0.3765 |
| Naive (1/N)                                   |             | 0.1131  | 0.1131  | 0.1131 | 0.1131 | 0.1131 | 0.1131 |
| Plug-in                                       |             | -0.3538 | 0.2516  | 0.3119 | 0.2126 | 0.3380 | 0.3804 |
| Shrinkage                                     |             | -0.3537 | 0.2507  | 0.3116 | 0.2124 | 0.3377 | 0.3795 |
| Bayesian NI                                   |             | -0.3538 | 0.2516  | 0.3119 | 0.2126 | 0.3380 | 0.3804 |
| Bayesian I                                    | 240         | -0.3505 | 0.3548  | 0.3636 | 0.3520 | 0.3713 | 0.3837 |
| MELO NI                                       |             | -0.3174 | 0.2450  | 0.3095 | 0.2242 | 0.3377 | 0.3784 |
| MELO I                                        |             | -0.3380 | 0.3552  | 0.3643 | 0.3530 | 0.3718 | 0.3839 |
| Naive (1/N)                                   |             | 0.1167  | 0.1167  | 0.1167 | 0.1167 | 0.1167 | 0.1167 |
| Stocks= 50; SR_120=1.20819; SR_240=0.9470014  |             |         |         |        |        |        |        |
| Method                                        | Sample size | Min     | 1st Q   | Median | Mean   | 3rd Q  | Max    |
| Plug-in                                       |             | -0.7976 | 0.5276  | 0.6224 | 0.4656 | 0.6975 | 0.9057 |
| Shrinkage                                     |             | -0.7948 | 0.5280  | 0.6223 | 0.4659 | 0.6955 | 0.9052 |
| Bayesian NI                                   |             | -0.7976 | 0.5276  | 0.6224 | 0.4656 | 0.6975 | 0.9057 |
| Bayesian I                                    | 120         | -0.9322 | 0.8002  | 0.8358 | 0.7750 | 0.8766 | 0.9993 |
| MELO NI                                       |             | -0.7309 | 0.5235  | 0.6219 | 0.4795 | 0.6933 | 0.9164 |
| MELO I                                        |             | -0.7833 | 0.7728  | 0.8158 | 0.7580 | 0.8548 | 0.9927 |
| Naive (1/N)                                   |             | 0.1188  | 0.1188  | 0.1188 | 0.1188 | 0.1188 | 0.1188 |
| Plug-in                                       |             | -0.7454 | 0.6335  | 0.6719 | 0.6049 | 0.7123 | 0.8275 |
| Shrinkage                                     |             | -0.7450 | 0.6346  | 0.6720 | 0.6050 | 0.7121 | 0.8295 |
| Bayesian NI                                   |             | -0.7454 | 0.6335  | 0.6719 | 0.6049 | 0.7123 | 0.8275 |
| Bayesian I                                    | 240         | -0.8014 | 0.7870  | 0.8054 | 0.7974 | 0.8210 | 0.8685 |
| MELO NI                                       |             | -0.7076 | 0.6307  | 0.6716 | 0.6116 | 0.7116 | 0.8259 |
| MELO I                                        |             | -0.6929 | 0.7838  | 0.8016 | 0.7929 | 0.8181 | 0.8746 |
| Naive (1/N)                                   |             | 0.1260  | 0.1260  | 0.1260 | 0.1260 | 0.1260 | 0.1260 |

Note: This table shows summary statistics for the squared error.

“NI”: Non-informative priors. “I”: Informative priors.

Stochastic errors are drawn from a AR(1) process.

**Table 2.16:** Weights: Treynor-Black using Student's-t

| Stocks = 10 |             |        |        |        |            |        |                |
|-------------|-------------|--------|--------|--------|------------|--------|----------------|
| Method      | Sample size | Min    | 1st Q  | Median | Mean       | 3rd Q  | Max            |
| Plug-in     |             | 0.2840 | 0.8241 | 1.7772 | 465.7448   | 6.2597 | 123,955.8744   |
| Bayesian NI |             | 0.0016 | 0.0286 | 0.0669 | 336.2529   | 0.2235 | 158,033.8534   |
| Bayesian I  | 120         | 0.0005 | 0.0066 | 0.0169 | 0.0760     | 0.0433 | 10.2129        |
| MELO NI     |             | 0.0021 | 0.0182 | 0.0420 | 0.0885     | 0.0885 | 1.6260         |
| MELO I      |             | 0.0007 | 0.0065 | 0.0154 | 0.0272     | 0.0312 | 0.5434         |
| Naive (1/N) |             | 0.2802 | 0.2802 | 0.2802 | 0.2802     | 0.2802 | 0.2802         |
| Plug-in     |             | 0.2372 | 0.6706 | 1.2859 | 1,254.1817 | 4.3356 | 1,039,877.1002 |
| Bayesian NI |             | 0.0011 | 0.0135 | 0.0343 | 146.9521   | 0.0959 | 144,125.6329   |
| Bayesian I  | 240         | 0.0003 | 0.0035 | 0.0081 | 0.0235     | 0.0221 | 0.9403         |
| MELO NI     |             | 0.0015 | 0.0118 | 0.0257 | 0.0455     | 0.0562 | 1.5436         |
| MELO I      |             | 0.0003 | 0.0033 | 0.0089 | 0.0170     | 0.0198 | 0.4438         |
| Naive (1/N) |             | 0.2802 | 0.2802 | 0.2802 | 0.2802     | 0.2802 | 0.2802         |
| Stocks = 50 |             |        |        |        |            |        |                |
| Plug-in     |             | 0.9544 | 1.2917 | 1.8874 | 5,557.4684 | 4.7195 | 4,267,788.4470 |
| Bayesian NI |             | 0.0102 | 0.1403 | 0.3039 | 0.5308     | 0.6233 | 12.6842        |
| Bayesian I  | 120         | 0.0013 | 0.0061 | 0.0116 | 0.0224     | 0.0253 | 0.5972         |
| MELO NI     |             | 0.0011 | 0.0072 | 0.0145 | 0.0282     | 0.0298 | 0.6366         |
| MELO I      |             | 0.0013 | 0.0060 | 0.0115 | 0.0217     | 0.0250 | 0.4954         |
| Naive (1/N) |             | 1.0380 | 1.0380 | 1.0380 | 1.0380     | 1.0380 | 1.0380         |
| Plug-in     |             | 0.9059 | 1.1102 | 1.3273 | 340.1823   | 2.3147 | 117,699.5531   |
| Bayesian NI |             | 0.0129 | 0.1593 | 0.2646 | 0.3363     | 0.4349 | 2.4870         |
| Bayesian I  | 240         | 0.0005 | 0.0029 | 0.0052 | 0.0095     | 0.0119 | 0.0968         |
| MELO NI     |             | 0.0008 | 0.0033 | 0.0063 | 0.0111     | 0.0133 | 0.0986         |
| MELO I      |             | 0.0004 | 0.0029 | 0.0052 | 0.0094     | 0.0116 | 0.0920         |
| Naive (1/N) |             | 1.0380 | 1.0380 | 1.0380 | 1.0380     | 1.0380 | 1.0380         |

Note: This table shows summary statistics for the squared error.

“NI”: Non-informative priors. “I”: Informative priors. Stochastic errors are drawn from a multivariate student's-t distribution with 4 degrees of freedom.

**Table 2.17:** Weights: Treynor-Black using AR(1)

| Stocks = 10 |             |        |        |        |             |        |                 |
|-------------|-------------|--------|--------|--------|-------------|--------|-----------------|
| Method      | Sample size | Min    | 1st Q  | Median | Mean        | 3rd Q  | Max             |
| Plug-in     |             | 0.2842 | 0.9042 | 1.9296 | 1,259.3917  | 7.9150 | 622,875.1781    |
| Bayesian NI |             | 0.0386 | 0.4883 | 1.6043 | 212.1123    | 7.5663 | 98,674.7024     |
| Bayesian I  | 120         | 0.0313 | 0.3451 | 1.0556 | 1,032.9164  | 4.3053 | 699,137.6630    |
| MELO NI     |             | 0.0151 | 0.1747 | 0.3005 | 0.4110      | 0.5126 | 3.3628          |
| MELO I      |             | 0.0282 | 0.0957 | 0.1395 | 0.2062      | 0.2118 | 2.3360          |
| Naive (1/N) |             | 0.2802 | 0.2802 | 0.2802 | 0.2802      | 0.2802 | 0.2802          |
| Plug-in     |             | 0.2117 | 0.7332 | 1.4472 | 1,007.6181  | 5.2083 | 608,862.9270    |
| Bayesian NI |             | 0.0330 | 0.3761 | 1.6678 | 2,369.7168  | 9.5485 | 1,671,944.1212  |
| Bayesian I  | 240         | 0.0730 | 0.4133 | 0.9935 | 67,889.4698 | 2.9586 | 67,811,745.6635 |
| MELO NI     |             | 0.0154 | 0.1338 | 0.2276 | 0.3704      | 0.4464 | 4.3305          |
| MELO I      |             | 0.0389 | 0.1178 | 0.1678 | 0.2101      | 0.2449 | 2.0109          |
| Naive (1/N) |             | 0.2802 | 0.2802 | 0.2802 | 0.2802      | 0.2802 | 0.2802          |
| Stocks = 50 |             |        |        |        |             |        |                 |
| Plug-in     |             | 0.9153 | 1.4745 | 2.3718 | 6,021.6713  | 6.9250 | 5,525,522.2559  |
| Bayesian NI |             | 0.3203 | 0.9784 | 1.4347 | 1,581.8523  | 3.4823 | 1,322,490.9264  |
| Bayesian I  | 120         | 0.3534 | 0.7059 | 0.8081 | 1.0619      | 0.9075 | 240.7099        |
| MELO NI     |             | 0.3384 | 0.8726 | 1.0544 | 1.1292      | 1.2917 | 3.2231          |
| MELO I      |             | 0.4022 | 0.7142 | 0.8041 | 0.8081      | 0.8957 | 1.2478          |
| Naive (1/N) |             | 1.0380 | 1.0380 | 1.0380 | 1.0380      | 1.0380 | 1.0380          |
| Plug-in     |             | 0.9080 | 1.2728 | 1.8210 | 39,426.6828 | 4.5423 | 38,989,535.9672 |
| Bayesian NI |             | 0.3988 | 0.8340 | 1.0559 | 18.8188     | 1.4966 | 5,449.2732      |
| Bayesian I  | 240         | 0.4497 | 0.7007 | 0.7765 | 0.7735      | 0.8496 | 1.1393          |
| MELO NI     |             | 0.3688 | 0.8017 | 0.9573 | 0.9812      | 1.1197 | 2.4815          |
| MELO I      |             | 0.4693 | 0.7108 | 0.7827 | 0.7789      | 0.8503 | 1.0849          |
| Naive (1/N) |             | 1.0380 | 1.0380 | 1.0380 | 1.0380      | 1.0380 | 1.0380          |

Note: This table shows summary statistics for the squared error.

“NI”: Non-informative priors. “I”: Informative priors.

Stochastic errors are drawn from a AR(1) process.

**Table 2.18:** Information ratio: Treynor-Black using Student's-t

| Stocks= 10; IR= 0.3214409 |             |         |        |        |        |        |        |
|---------------------------|-------------|---------|--------|--------|--------|--------|--------|
| Method                    | Sample size | Min     | 1st Q  | Median | Mean   | 3rd Q  | Max    |
| Plug-in                   |             | -0.0370 | 0.0087 | 0.0235 | 0.0220 | 0.0340 | 0.0860 |
| Bayesian NI               |             | -0.2367 | 0.1923 | 0.2279 | 0.2070 | 0.2550 | 0.3150 |
| Bayesian I                | 120         | 0.1998  | 0.2785 | 0.2905 | 0.2877 | 0.2995 | 0.3162 |
| MELO NI                   |             | -0.1551 | 0.2033 | 0.2387 | 0.2233 | 0.2632 | 0.3135 |
| MELO I                    |             | 0.2064  | 0.2796 | 0.2916 | 0.2885 | 0.3005 | 0.3159 |
| Naive (1/N)               |             | 0.0490  | 0.0490 | 0.0490 | 0.0490 | 0.0490 | 0.0490 |
| Plug-in                   |             | -0.0480 | 0.0131 | 0.0295 | 0.0284 | 0.0429 | 0.0999 |
| Bayesian NI               |             | -0.1994 | 0.2386 | 0.2614 | 0.2554 | 0.2789 | 0.3113 |
| Bayesian I                | 240         | 0.2449  | 0.2959 | 0.3029 | 0.3012 | 0.3081 | 0.3193 |
| MELO NI                   |             | -0.1334 | 0.2469 | 0.2680 | 0.2612 | 0.2825 | 0.3114 |
| MELO I                    |             | 0.2498  | 0.2960 | 0.3027 | 0.3012 | 0.3084 | 0.3195 |
| Naive (1/N)               |             | 0.0490  | 0.0490 | 0.0490 | 0.0490 | 0.0490 | 0.0490 |
| Stocks= 50; IR=1.909063   |             |         |        |        |        |        |        |
| Method                    | Sample size | Min     | 1st Q  | Median | Mean   | 3rd Q  | Max    |
| Plug-in                   |             | -0.0599 | 0.0157 | 0.0341 | 0.0298 | 0.0484 | 0.1003 |
| Bayesian NI               |             | 0.7274  | 0.9536 | 1.0237 | 1.0199 | 1.0819 | 1.3111 |
| Bayesian I                | 120         | 1.1116  | 1.3356 | 1.3978 | 1.3946 | 1.4559 | 1.6795 |
| MELO NI                   |             | 0.9739  | 1.2443 | 1.3206 | 1.3145 | 1.3889 | 1.6045 |
| MELO I                    |             | 1.1092  | 1.3346 | 1.3962 | 1.3930 | 1.4544 | 1.6618 |
| Naive (1/N)               |             | 0.0882  | 0.0882 | 0.0882 | 0.0882 | 0.0882 | 0.0882 |
| Plug-in                   |             | -0.0674 | 0.0336 | 0.0507 | 0.0456 | 0.0639 | 0.0997 |
| Bayesian NI               |             | 1.0338  | 1.2289 | 1.2755 | 1.2728 | 1.3169 | 1.4602 |
| Bayesian I                | 240         | 1.4132  | 1.5688 | 1.6103 | 1.6065 | 1.6452 | 1.7830 |
| MELO NI                   |             | 1.3343  | 1.5255 | 1.5672 | 1.5643 | 1.6082 | 1.7448 |
| MELO I                    |             | 1.4194  | 1.5685 | 1.6080 | 1.6053 | 1.6443 | 1.7888 |
| Naive (1/N)               |             | 0.0882  | 0.0882 | 0.0882 | 0.0882 | 0.0882 | 0.0882 |

Note: This table shows summary statistics for the squared error.

“NI”: Non-informative priors. “I”: Informative priors. Stochastic errors are drawn from a multivariate student's-t distribution with 4 degrees of freedom.

**Table 2.19:** Information ratio: Treynor-Black using AR(1)

| Stocks= 10; IR= 0.3214409 |             |         |         |        |        |        |        |
|---------------------------|-------------|---------|---------|--------|--------|--------|--------|
| Method                    | Sample size | Min     | 1st Q   | Median | Mean   | 3rd Q  | Max    |
| Plug-in                   |             | -0.0499 | 0.0032  | 0.0172 | 0.0160 | 0.0292 | 0.0805 |
| Bayesian NI               |             | -0.1766 | -0.0161 | 0.0636 | 0.0424 | 0.1024 | 0.1968 |
| Bayesian I                | 120         | -0.2033 | 0.1379  | 0.1579 | 0.1410 | 0.1763 | 0.2473 |
| MELO NI                   |             | -0.1529 | 0.0306  | 0.0740 | 0.0643 | 0.1077 | 0.2046 |
| MELO I                    |             | -0.1516 | 0.1293  | 0.1506 | 0.1387 | 0.1690 | 0.2473 |
| Naive (1/N)               |             | 0.0490  | 0.0490  | 0.0490 | 0.0490 | 0.0490 | 0.0490 |
| Plug-in                   |             | -0.0555 | 0.0105  | 0.0250 | 0.0236 | 0.0369 | 0.1297 |
| Bayesian NI               |             | -0.2004 | 0.0404  | 0.0973 | 0.0627 | 0.1265 | 0.2318 |
| Bayesian I                | 240         | -0.2007 | 0.1623  | 0.1771 | 0.1729 | 0.1917 | 0.2471 |
| MELO NI                   |             | -0.1424 | 0.0550  | 0.1000 | 0.0815 | 0.1275 | 0.2239 |
| MELO I                    |             | -0.1397 | 0.1572  | 0.1719 | 0.1690 | 0.1868 | 0.2400 |
| Naive (1/N)               |             | 0.0490  | 0.0490  | 0.0490 | 0.0490 | 0.0490 | 0.0490 |
| Stocks= 50; IR=1.909063   |             |         |         |        |        |        |        |
| Method                    | Sample size | Min     | 1st Q   | Median | Mean   | 3rd Q  | Max    |
| Plug-in                   |             | -0.0552 | 0.0010  | 0.0221 | 0.0191 | 0.0400 | 0.0904 |
| Bayesian NI               |             | -0.1212 | 0.0337  | 0.0682 | 0.0599 | 0.0966 | 0.1776 |
| Bayesian I                | 120         | 0.1136  | 0.1824  | 0.1984 | 0.1985 | 0.2156 | 0.2848 |
| MELO NI                   |             | -0.0727 | 0.0477  | 0.0798 | 0.0727 | 0.1049 | 0.2142 |
| MELO I                    |             | 0.1017  | 0.1852  | 0.2007 | 0.2008 | 0.2171 | 0.2816 |
| Naive (1/N)               |             | 0.0882  | 0.0882  | 0.0882 | 0.0882 | 0.0882 | 0.0882 |
| Plug-in                   |             | -0.0662 | 0.0169  | 0.0353 | 0.0310 | 0.0514 | 0.0947 |
| Bayesian NI               |             | -0.1258 | 0.0800  | 0.1068 | 0.1034 | 0.1333 | 0.2247 |
| Bayesian I                | 240         | 0.1742  | 0.2219  | 0.2366 | 0.2370 | 0.2510 | 0.3236 |
| MELO NI                   |             | -0.0772 | 0.0907  | 0.1152 | 0.1118 | 0.1376 | 0.2275 |
| MELO I                    |             | 0.1776  | 0.2232  | 0.2388 | 0.2382 | 0.2520 | 0.3211 |
| Naive (1/N)               |             | 0.0882  | 0.0882  | 0.0882 | 0.0882 | 0.0882 | 0.0882 |

Note: This table shows summary statistics for the squared error.

“NI”: Non-informative priors. “I”: Informative priors.

Stochastic errors are drawn from a AR(1) process.

### 3 GUI user instructions

We have developed a graphical user interface (GUI) using Shiny to facilitate the implementation of the methodologies proposed in this paper. Here, we present a brief description of how it works. First, go to <http://www.besmarter-team.org/software>. This web page has other applications, so “PORTFOLIO SELECTION: MELO” should be selected (see Figure 3.1).

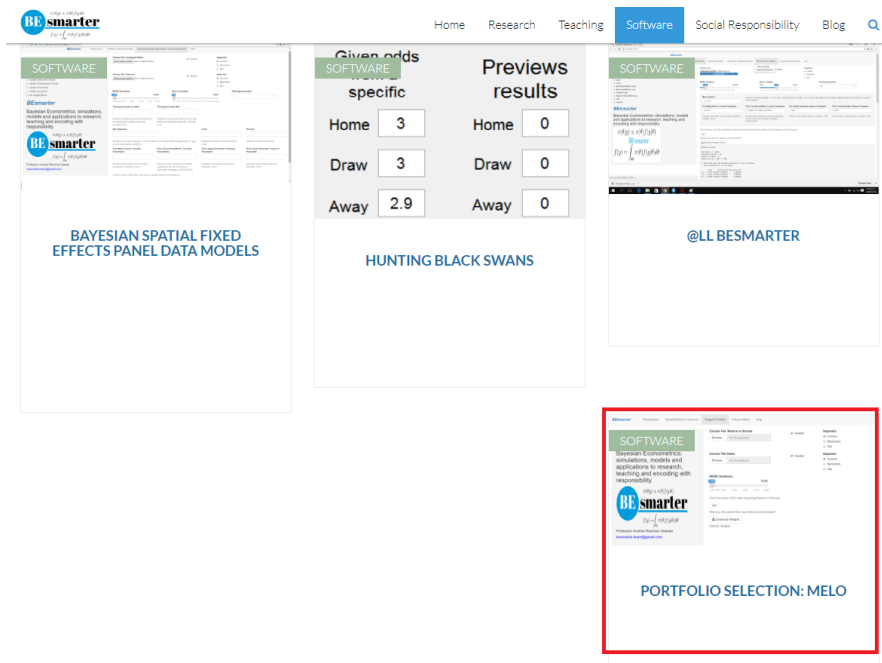

**Fig. 3.1:** GUI: BeSmarter software

Figure 3.2 shows our GUI. It has five tap panels: Presentation, Global Minimum-Variance, Tangency Portfolio, Treynor–Blacka, and Help. The Presentation panel contains information about our research and the Help panel contains this document as a reference.

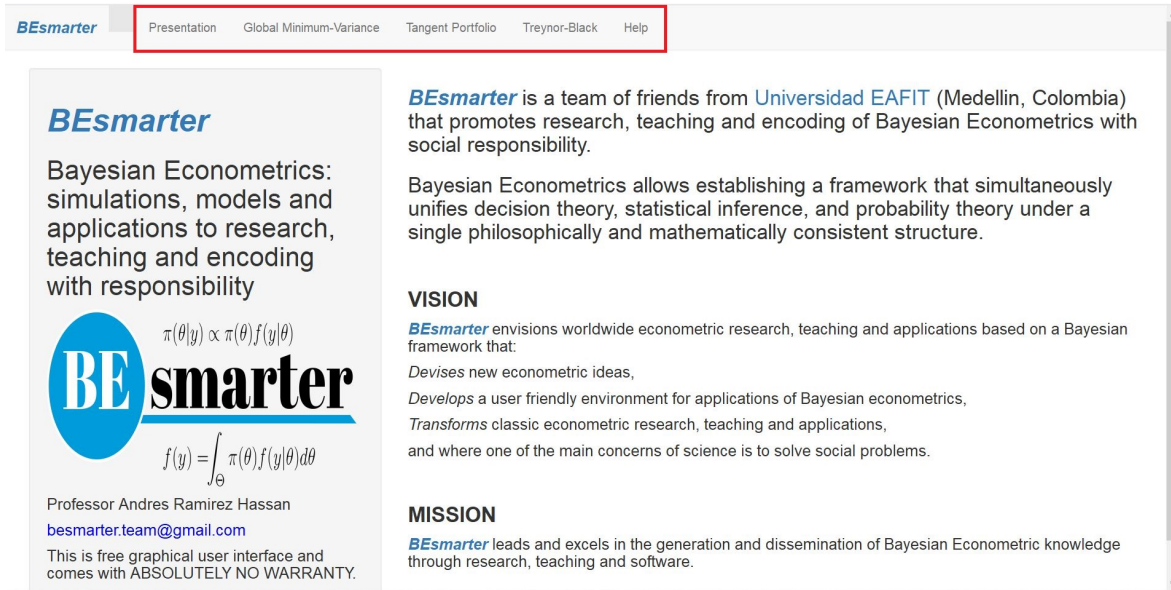

**Fig. 3.2:** GUI: Presentation

We describe how to use tangency portfolio and Treynor–Black panels, the panel for global minimum variance operates in a similar. Clicking on “Tangency Portfolio” leads to the window shown in Figure 3.3. To implement the tangency portfolio trade strategy, it is necessary to have a csv file with the excess of returns. In this file, each column must represent the historical excess of return for each asset in the portfolio. Additionally, the columns can be separated by comma, semicolon, or tab and must be specified in the right side of the panel (Figure 3.4). The last file should be selected from your computer by clicking the bottom “Choose File: Returns in Excess”. In case you want to use the informative cases, you should have a csv file with the information about the expected returns, which must be a column vector. The bottom “Choose File: Views” is used to load the views about the expected returns.



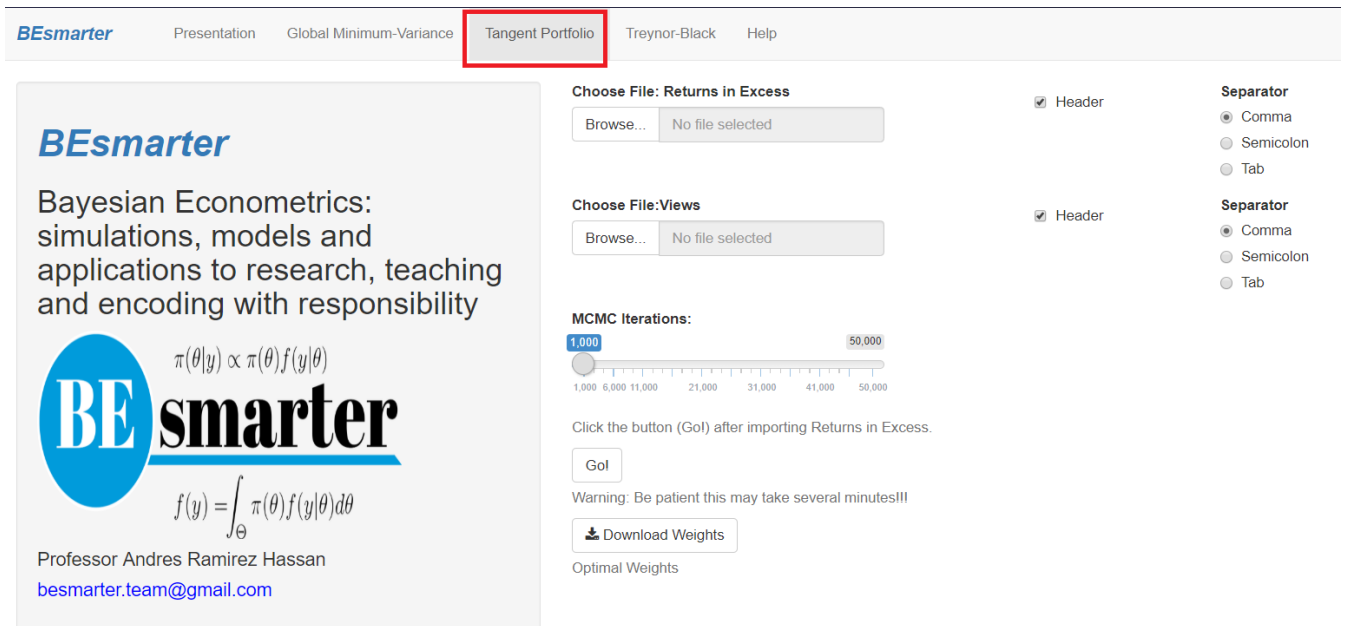

**Fig. 3.3:** GUI: Tangency portfolio

The window that is given once the excess of returns are loaded is shown in Figure 3.4. Then, clicking the bottom “Go” button calculates the portfolio weights.

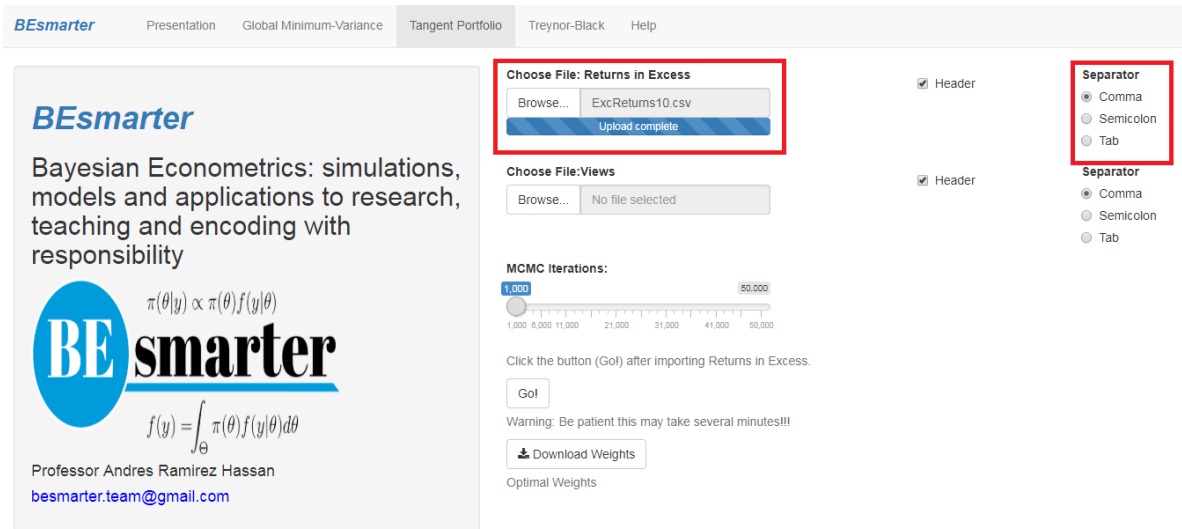

**Fig. 3.4:** GUI: Excess of Returns loaded

The weights are shown in the window in Figure 3.5. Given that we did not load any file with the views, the weights for the methodologies that use informative priors are not calculated. However, Figure 3.6 shows the window if you also load a file with the views for the returns. Finally, if you want to download the weights in a csv file, just click the “Download Weights” bottom.

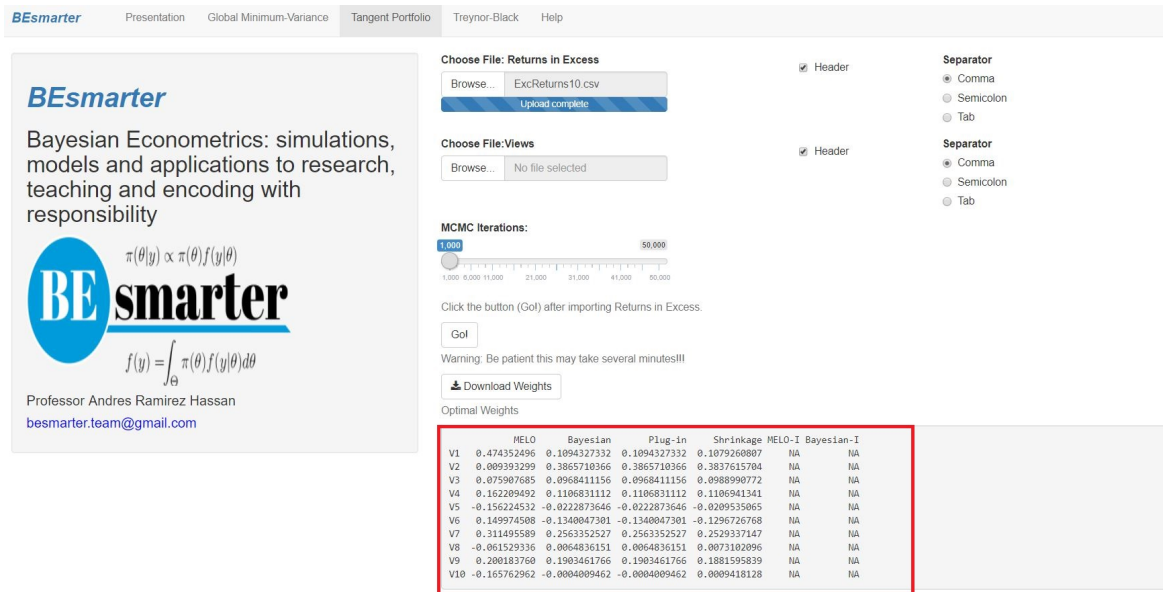

Fig. 3.5: GUI: Portfolios weights

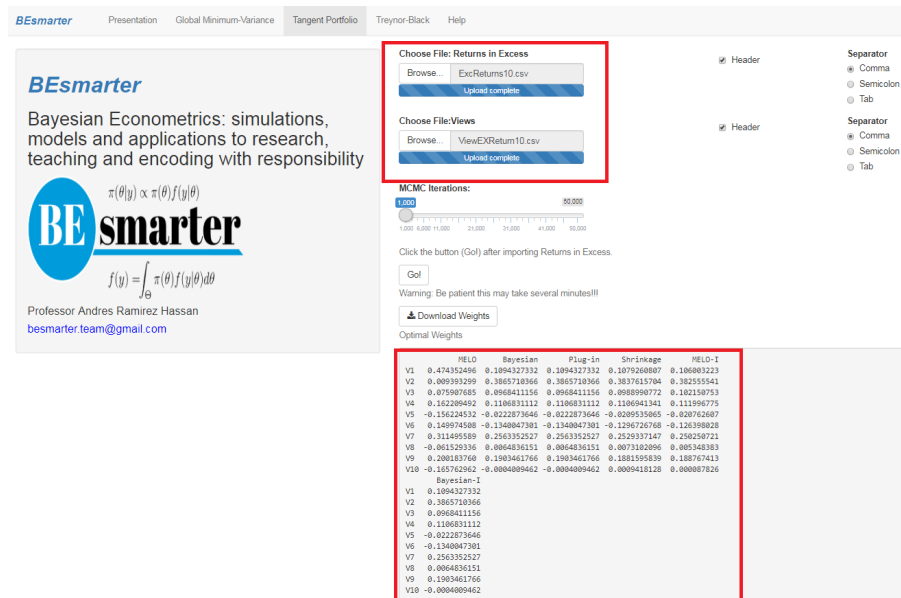

Fig. 3.6: GUI: Portfolios weights including informative methodologies

Now, if you want to apply the Treynor–Black trading strategy, you should click on the panel “Treynor–Black”, as shown in Figure 3.7. For the implementation of this methodology, we need not only the historical excess of returns for each asset in the portfolio but also the historical excess of returns of the factor. Thus, for the excess of return, a csv file (as described in the tangency portfolio panel) and a different csv file with the historical information for the excess of returns of the factor associated with the model are required.<sup>4</sup>

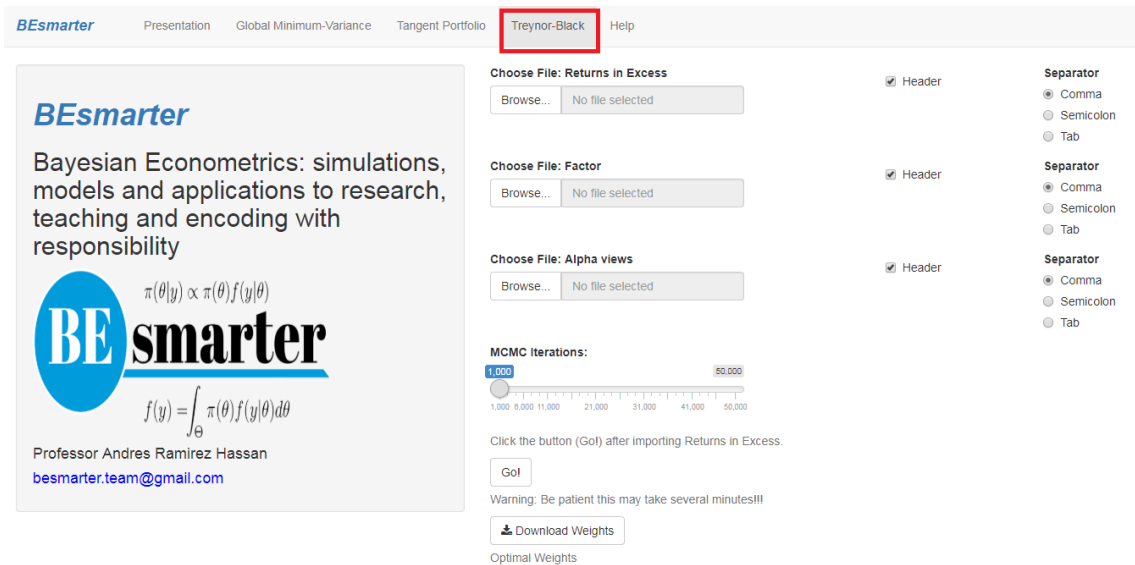

Fig. 3.7: Treynor–Black panel

The panel after loading the historical information for excess of returns of the assets and the factor is shown in Figure 3.8. Then, you just need to click the “GO” button to estimate the weights of the portfolio. The weights look like Figure 3.9. Finally, in case you have information about the abnormal returns of the assets, you could incorporate it by the bottom “Choose file: Alpha views”. This information must be a column vector saved in a csv file (Figure 3.10). Finally, a csv file with the weights can be obtained by clicking the “Download Weights” button at the bottom of the page.

<sup>4</sup> This must be a column vector.

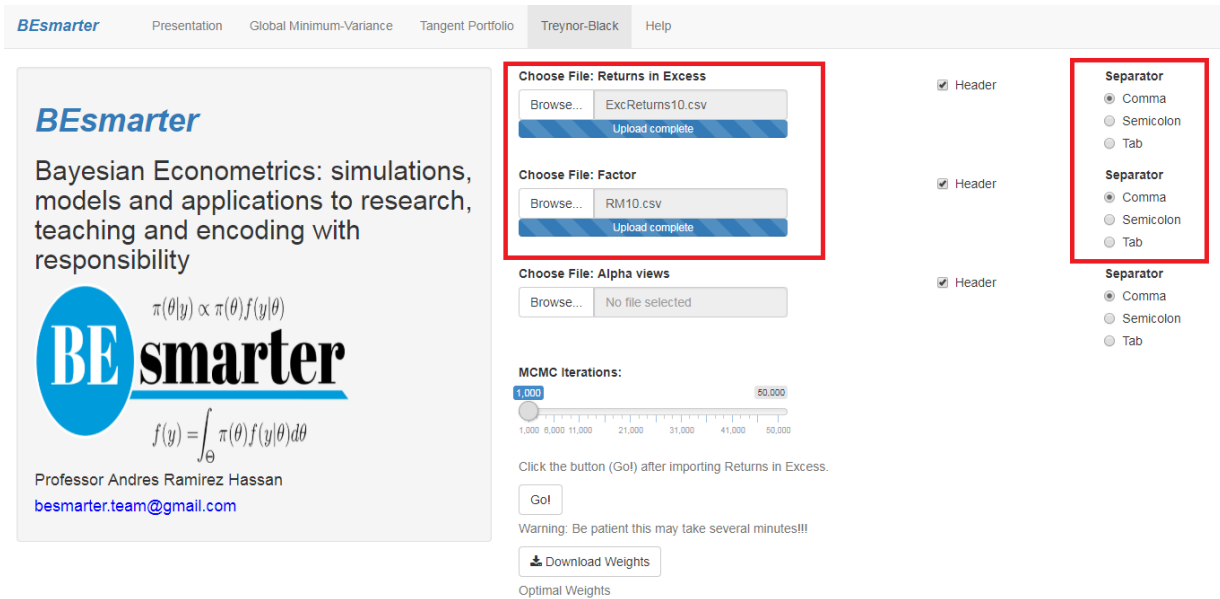

Fig. 3.8: Treynor-Black panel

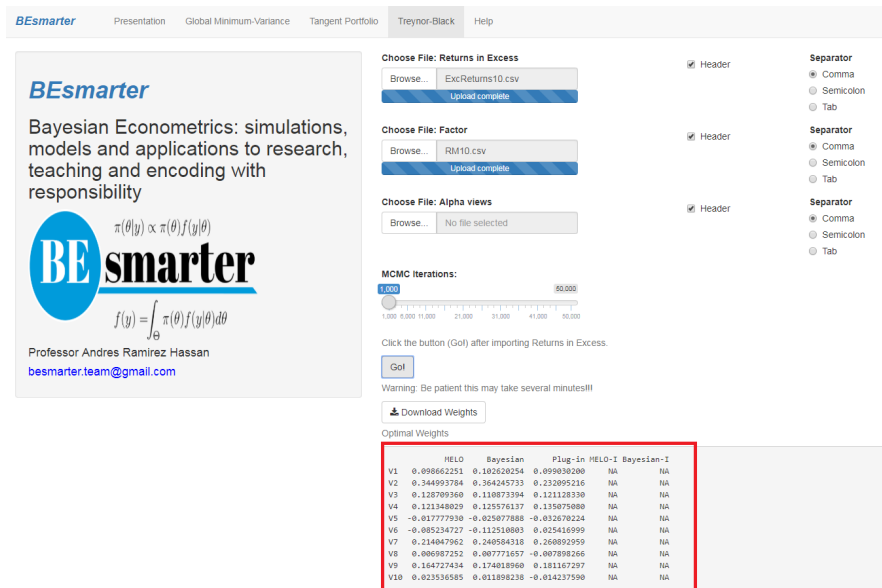

Fig. 3.9: Treynor-Black weights non-informative

BEsmarter Presentation Global Minimum-Variance Tangent Portfolio Treynor-Black Help

**BEsmarter**

Bayesian Econometrics: simulations, models and applications to research, teaching and encoding with responsibility

$\pi(\theta|y) \propto \pi(\theta)f(y|\theta)$ 

 $f(y) = \int_{\Theta} \pi(\theta)f(y|\theta)d\theta$

Professor Andres Ramirez Hassan  
besmarter.team@gmail.com

**Choose File: Returns in Excess**

Browse... ExcReturns10.csv  Header Separator  
 Comma  
 Semicolon  
 Tab

**Choose File: Factor**

Browse... RM10.csv  Header Separator  
 Comma  
 Semicolon  
 Tab

**Choose File: Alpha views**

Browse... ViewEXReturn10.csv  Header Separator  
 Comma  
 Semicolon  
 Tab

MCMC iterations: 50,000

Click the button (Go) after importing Returns in Excess.

Go

Warning: Be patient this may take several minutes!!!

**Download Weights**

Optimal Weights

|     | HELO        | Bayesian     | PJug-in      | HELO-I      | Bayesian-I   |
|-----|-------------|--------------|--------------|-------------|--------------|
| V1  | 0.09495177  | 0.102620254  | 0.099830200  | 0.09637399  | 0.104895126  |
| V2  | 0.33837002  | 0.364245733  | 0.232895216  | 0.35845450  | 0.371700757  |
| V3  | 0.12099994  | 0.110873394  | 0.121128330  | 0.11187649  | 0.106187635  |
| V4  | 0.12593184  | 0.125576137  | 0.135075080  | 0.12206996  | 0.120002952  |
| V5  | -0.01902354 | -0.025077888 | -0.032670224 | -0.01735996 | -0.024146056 |
| V6  | -0.08111397 | -0.112510803 | 0.025416999  | -0.10426252 | -0.119688208 |
| V7  | 0.21977847  | 0.240584318  | 0.260892959  | 0.23576864  | 0.245843982  |
| V8  | 0.01512158  | 0.00771657   | -0.007692656 | 0.01054121  | 0.007341545  |
| V9  | 0.16038431  | 0.174018960  | 0.181167297  | 0.17468070  | 0.179471060  |
| V10 | 0.02359758  | 0.011898238  | -0.014237590 | 0.01285701  | 0.007791207  |

Fig. 3.10: Treynor-Black weights with prior information

## References

1. A. Zellner, *An introduction to Bayesian inference in econometrics* (John Wiley, 1996)
2. E. Greenberg, *Introduction to Bayesian Econometrics*, vol. 85 (2009). DOI 10.1111/j.1475-4932.2009.00578.x. URL <http://www.amazon.de/dp/0521858712>
3. G.c. Tiao, A. Zellner, *Journal of the Royal Statistical Society. Series B: Statistical Methodology* **26**(2), 277 (1964). URL <http://www.jstor.org/stable/2984424>
4. J.M. Dickey, *The Annals of Mathematical Statistics* **38**(2), 511 (1967). URL <http://www.jstor.org/stable/2239163>
5. E. Lehmann, G. Casella, *Theory of Point Estimation*, second edition edn. (Springer, 2003)
6. P.J. Bickel, J.A. Yahav, *Z. Wahrsch. Verw. Geb.* **11**, 257 (1969)
7. R. Kass, D. Steffey, *Journal of the American Statistical Association* **84**(407), 717 (1989)
